RESEARCH ARTICLE

# Experimental Crossing of Two Distinct Species of Leopard Geckos, *Eublepharis angramainyu* and *E. macularius*: Viability, Fertility and Phenotypic Variation of the Hybrids

Jitka Jančúchová-Lásková, Eva Landová, Daniel Frynta\*

Department of Zoology, Faculty of Science, Charles University in Prague, Prague, Czech Republic

\* [frynta@centrum.cz](mailto:frynta@centrum.cz)

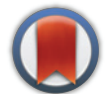

CrossMark  
click for updates

OPEN ACCESS

**Citation:** Jančúchová-Lásková J, Landová E, Frynta D (2015) Experimental Crossing of Two Distinct Species of Leopard Geckos, *Eublepharis angramainyu* and *E. macularius*: Viability, Fertility and Phenotypic Variation of the Hybrids. PLoS ONE 10 (12): e0143630. doi:10.1371/journal.pone.0143630

**Editor:** Suzannah Rutherford, Fred Hutchinson Cancer Research Center, UNITED STATES

**Received:** June 29, 2015

**Accepted:** November 7, 2015

**Published:** December 3, 2015

**Copyright:** © 2015 Jančúchová-Lásková et al. This is an open access article distributed under the terms of the [Creative Commons Attribution License](https://creativecommons.org/licenses/by/4.0/), which permits unrestricted use, distribution, and reproduction in any medium, provided the original author and source are credited.

**Data Availability Statement:** All relevant data are within the paper.

**Funding:** This study was supported by the Grant Agency of the Academy of Sciences of the Czech Republic project no. IAA 601410803 and by the Specific Academic Research Projects Competition project no. SVV-2015-260208. The funders had no role in study design, data collection and analysis, decision to publish, or preparation of the manuscript.

**Competing Interests:** The authors have declared that no competing interests exist.

## Abstract

Hybridization between distinct species of animals and subsequent genetic introgression plays a considerable role in the speciation process and the emergence of adaptive characters. Fitness of between-species hybrids usually sharply decreases with the divergence time of the concerned species and the divergence depth, which still allows for a successful crossing differs among principal clades of vertebrates. Recently, a review of hybridization events among distinct lizard species revealed that lizards belong to vertebrates with a highly developed ability to hybridize. In spite of this, reliable reports of experimental hybridizations between genetically fairly divergent species are only exceptional. Here, we show the results of the crossing of two distinct allopatric species of eyelid geckos possessing temperature sex determination and lacking sex chromosomes: *Eublepharis macularius* distributed in Pakistan/Afghanistan area and *E. angramainyu*, which inhabits Mesopotamia and adjacent areas. We demonstrated that F<sub>1</sub> hybrids were viable and fertile, and the introgression of *E. angramainyu* genes into the *E. macularius* genome can be enabled via a backcrossing. The examined hybrids (except those of the F<sub>2</sub> generation) displayed neither malformations nor a reduced survival. Analyses of morphometric and coloration traits confirmed phenotypic distinctness of both parental species and their F<sub>1</sub> hybrids. These findings contrast with long-term geographic and an evolutionary separation of the studied species. Thus, the occurrence of fertile hybrids of comparably divergent species, such as *E. angramainyu* and *E. macularius*, may also be expected in other taxa of squamates. This would violate the current estimates of species diversity in lizards.

## Introduction

The fact that related species of animals are sometimes able to hybridize is known since the beginning of evolutionary biology [1]. Nevertheless, the crucial importance of hybridization of

animal species for evolutionary processes has been largely overlooked for decades (but see [2–6]). In recent years, molecular markers allowed zoologists to detect occurrence of natural between-species hybrids in the field. As a result, presence of hybrid zones and/or introgressed genes has been documented in many animal taxa (e.g., fruit flies: [7]; butterflies: [8]; fishes: [9]; toads: [10]; snakes: [11]; lizards: [12]; Darwin's finches: [13]; nightingales: [14]; house mice: [15]; dolphins: [16]). This suggests that at least in the terminal branches of the phylogenetic tree, a predominantly divergent pattern of evolution caused by cladogenesis may be supplemented by a complementary process (syngensis). This process breaks incomplete reproductive isolation mechanisms (RIMs) among related species, enabling genetic introgression from a donor species to a recipient one. The recipient populations may benefit from a gene flow supplying alien alleles. These effects on the fitness have been already tried and tested in the donor population. A recombination with the introgressed alleles can give rise to hopeful transgressive phenotypes with extreme trait values exceeding the combined range of parental species [4, 17–19]. Moreover to these evolutionary advantages, especially hybrids of the first filial generation and backcrosses, may improve their fitness due to overdominance and/or masking of the deleterious recessives, usually referred to as heterosis or hybrid vigour [20–24]. In extreme cases as, e.g., some of the Darwin's finches, interspecific hybrids exhibit elevated fitness when compared with the parental species and genetic identities of the species have become fuzzy [25].

Hybrid sterility and/or inviability contribute fundamentally to reproductive isolation and delimitation of animal species. In a typical case, fitness of between-species and sometimes also between-population hybrids, especially those of  $F_2$  and other segregating generations, is considerably reduced. This phenomenon is referred to as an outbreeding depression [20, 26]. Dobzhansky (1936, 1937) [27, 28] and Muller (1940, 1942) [29, 30] recognized that the easiest way to the evolution of postzygotic reproductive isolation mechanisms (RIMs) of this kind is a genetic interaction (incompatibility) of alleles belonging to separate genes (loci). The original prevailing  $A_1A_1B_1B_1$  genotype is replaced with  $A_2A_2B_2B_2$  in the daughter population that becomes reproductively isolated due to reduced fitness of the hybrids (typically  $A_1A_1B_2B_2$  and  $A_2A_2B_1B_1$ ). Accumulation of Dobzhansky-Muller incompatibilities (DMIs) is probably a function of time that elapsed from the divergence of the crossed species [31]. This theoretical prediction was corroborated by experimental data in multiple taxa of animals (e.g., in frogs [32], in pigeons and doves [33], in centrarchid fishes [34], in *Drosophila* fruit fly [35, 36], in galliform birds [37], *Triturus* newt [38], but see [39] for the main role of sexual selection in hybridizing sword tail fishes). However, little is known about evolutionary rate at which these incompatibilities arise.

In vertebrates, hybrids of extremely distant genera were reported in fishes (e.g., Lepisosteidae: *Lepisosteus* and *Atractosteus* separated for 33–100 million years [40, 41]; Centrarchidae: *Acantharchus* and *Micropterus* separated for ~35 million years [34] and frogs (e.g., Hylidae: *Hyla* and *Pseudacris* separated for 22–80 million years [42, 43]). The time required for accumulation of efficient postzygotic RIMs varies considerably even among the principal clades of amniots (for details of genetic divergence in lizards, see the review [44]). The best documented comparison represents at least five-fold difference between mammals, typically losing the ability to produce viable  $F_1$  hybrids after one or two million years of separation, and birds losing this ability after 20 million years [45–47]. Divergence time estimates reported for marine turtles producing viable hybrids are even longer (e.g., *Chelonia* x *Caretta* [42], estimated to ~63 mye [48]). Vital and sometimes also fertile hybrids of distinct species/genera are also known for other chelonian taxa (e.g., Bataguridae: *Cyclemys* x *Occadia* [49]; *Mauremys* x *Sacalia* [50]; Chelidae: between some of the species in the genus *Chelodina* [51]). This may be attributed to a slow mutation rate reported in the chelonians [52]. The crocodylians, a sister taxon of the birds, are also able to produce viable between-species hybrids (e.g., *Crocodylus siamensis* x *C.*

*rhomboifer* [53]). Nevertheless, the genus *Crocodylus* is relatively young; the oldest records of this genus are known from the end of the Miocene [54]. In contrast to the high level of species diversity of lizards and snakes, there is only limited information about the time required to establish the postzygotic RIMs in most lineages of squamates. Most examples of viable F<sub>1</sub> hybrids of squamates come from unisexual species (e.g., *Leiolepis* [55]; *Darevskia* [56]; *Aspidoscelis* [57]; *Lepidodactylus* [58]; *Hemidactylus* [59]; *Heteronotia* [60]; *Nactus* [61]). In these cases, however, further reproduction of the hybrids that may be otherwise sterile is enabled by parthenogenesis and/or multiplication of the gene dosage (triploidy, tetraploidy). Except for the parthenogens and their close relatives, also viable F<sub>1</sub> hybrids of lizards belonging to distinct species or genera were reported in, e.g., true iguanids (e.g., *Conolophus* x *Amblyrhynchus* [62, 63]; *Ctenosaura similis* x *C. bakeri* [64]; *Iguana iguana* x *I. delicatissima* [65]) and lacertids (e.g., within the genus *Lacerta*: [66–70]; within the genus *Podarcis*: [71, 72]). Similar cases were repeatedly reported in snakes, e.g., pythons (*Morelia* x *Liasis* [73]; *Python natalensis* x *P. molurus bivittatus* [74]), colubrids (*Pituophis catenifer sayi* x *Pantherophis vulpinus* [75]) and viperids (*Vipera nikolskii* x *V. berus* [76, 77]). In our previous paper [44], we reviewed the available records of hybridization events in lizards and found that the upper limit of the HKY distance of cyt b gene between parental species producing viable homoploid bisexual hybrids is 19%; the corresponding distance for parental species of parthenogenetic hybrids is 21%. We also found that the experimental studies reliably reporting and documenting their further reproductive success in lizards are exceptional (but see [66–69], for a review see [44]).

The above mentioned differences among the higher taxa of amniots in the time-scale required for the evolution of postzygotic RIMs may have fundamental consequences on speciation patterns, which should be considered in the conservation theory and practice. The risk of outbreeding depression should be considered in defining taxonomic and/or population genetic delimitation of the conservation units in endangered species [78, 79]. Too broad definition of these units leads to a rapid increase in the expenses as well as demographic and genetic risks of extinction associated with small population numbers [78, 80–82].

In search of a dyad of model lizard species with allopatric distribution ranges that have been separated by well-dated geological events, we focused on the Middle East region. The Iranian Plateau and Zagros Mountains represent a distinct geographic barrier that limits the distribution and prevents contacts between lowland dwellers of Mesopotamia-Persian Gulf and those of Central Asia and Indian subcontinent [83]. History of these units is precisely known according to geological evidence; they originated as a result of a collision between Arabia and Eurasia plates that started 35–20 million years ago. Nevertheless, the main uplift of this area occurred 15–12 million years ago [84, 85]. Further topography growth of the external Zagros, Alborz, Kopet Dagh and Caucasus mountain belts reached its maximum 5 million years ago [86]. The long-lasting presence of the above described geographic barrier has clear consequences on a phylogenetic and phylogeographic structure of several reptilian taxa in Iran and adjacent areas; e.g., species complexes of the *Laudakia caucasica* [87, 88], *Eremias persica* [89], and *Mesalina watsonana* [90].

*Eublepharis macularius* (BLYTH, 1854), a lizard belonging to the family Eublepharidae, is a common laboratory animal, which is widely used as a model species of squamate reptiles in physiological [91–95], behavioural [96, 97], and evolutionary [98, 99] research. The distribution range of *E. macularius* includes large territories of Afghanistan, Pakistan and India [100]. Other species of the genus *Eublepharis* [100] are also distributed on the Indian subcontinent (*E. hardwicki*, *E. fuscus*) and Turkmenistan (*E. turkmenicus*). Another distinct species of the genus *Eublepharis*, the *E. angramainyu* (ANDERSON AND LEVITON, 1966) inhabits Mesopotamia and SW Iran [83]. The range of the *E. angramainyu* is separated from those of the *E. macularius* and remaining species of the genus *Eublepharis* by the Iranian Plateau and Zagros

Mountains [100]. Thus, the dyad of the *E. angramainyu* and *E. macularius* represents a promising model of species that underwent a long-lasting geographical isolation.

One may argue that the seashore along the Gulf of Oman was penetrable for the geckos of the genus *Eublepharis* at least in the past. However, sequence divergences between mitochondrial genes of the *E. macularius* and *E. angramainyu* are considerable (uncorrected p-distances for 303 bp fragment of cyt b gene exceed 19%; HKY85 distance 22%, Palupčiková unpublished data) and fully congruent with the geological dates of the main uplift of the Iranian Plateau.

The aim of this paper is to examine the ability of distinct lizard species evolving separately for several million years to hybridize and exchange genes. For this purpose we crossed the *E. angramainyu* and *E. macularius* under laboratory conditions and assessed (1) viability, (2) fertility and (3) phenotypic characters (body size, body shape, coloration pattern) of the hybrids and parental species. Successful production of viable and fertile F<sub>1</sub> crosses of our model species would further support the hypothesis that lizards possess slow (“avian” or “chelonian”) rather than rapid (“mammalian”) pattern of postzygotic RIM acquisition [44]. In accord with the general model of Dobzhansky-Muller incompatibilities and the empirical evidence in other animal taxa [101], we predicted that putative fitness losses affect more hybrids of F<sub>2</sub> generation than those of F<sub>1</sub> generation (all possessing a genotype A<sub>1</sub>A<sub>2</sub>B<sub>1</sub>B<sub>2</sub>).

## Materials and Methods

### Ethics Statement

All performed experiments were allowed by institutional Animal Care and Use Committee of the Charles University in Prague, and approved by Ethical Committee of Ministry of Education, Youth and Sports of the Czech Republic license no. 18147/203 and 24773/2008–10001. All animals from nature were purchased from a Czech company importing animals in the year 2002 and from private breeders. *Eublepharis* sp. does not belong to the species whose trade is limited by the CITES agreement or any other known regulations. According to the IUCN categorization it neither belongs to endangered species. After the study, geckos were used either for other behavioural experiments or for breeding purposes.

### Experimental procedures

The breeding stocks of the parental species were 38 females and ten males of an *E. macularius* (the first generation of descendants of wild-caught animals imported from Pakistan) and only five females and three males of the rare *E. angramainyu* (wild-caught animals and their two daughters; a putative locality of origin: Choqa Zambil, Khuzestan province, Iran, 32°00'N 48°31'E, for more details about the locality see [102]).

To obtain F<sub>1</sub> hybrids, 17 virgin females of the *E. macularius* were allowed to copulate with one breeding male of the *E. angramainyu*. The resulting F<sub>1</sub> hybrids were reared to sexual maturity and further bred to obtain F<sub>2</sub> hybrids and/or backcrosses with either *E. macularius* or with the same breeding male of the *E. angramainyu* (with their father). Fertility of some of the backcross hybrids was subsequently assessed by crossing with the parental species (for details see under the [Results](#) and [Table 1](#)). Because the geckos of the genus *Eublepharis* are able to store sperm for several months, each experimental female was allowed to copulate exclusively with a single male during a given mating season (lasting from January/February to July/August). In contrast, males were allowed to copulate with multiple females within a single breeding season. 15 F<sub>1</sub> hybrid females were experimentally crossed for more than one breeding season; this allowed us to test their fertility with two or three different males (first with F<sub>1</sub> male or one of the parental species and then with a male of the other parental species). As controls for the hybridization experiments, 16 females of the *E. macularius* and five *E. angramainyu* females

**Table 1. The incubation success of eggs (hatchability) and survival rates of hatchlings.** The parental species (*E. macularius*— $P_M$ , *E. angramainyu*— $P_A$ ), their hybrids of the first ( $F_1$ ) and second ( $F_2$ ) filial generations, backcrosses of  $F_1$  females to male of *E. angramainyu* ( $B_{1A}$ ; denoted as  $MAxMA$ ), the reciprocal backcrosses of  $F_1$  males or females to *E. macularius* ( $B_{1M}$ ; the individuals with father  $F_1$  hybrid are denoted as  $MxMA$ , while those with mother  $F_1$  hybrid as  $MAxM$ ), and two categories of higher order hybrids (crosses of  $MxMA$  females with males of either *E. macularius* or *E. angramainyu*). The above mentioned generations and/or crossings refer to the embryos and hatchlings.

| Crossing abbreviation           | M     | A     | MA    | MAxMA | MAxMA    | MAxM     | MxMA     | (MxMA)xA     | (MxMA)xM |
|---------------------------------|-------|-------|-------|-------|----------|----------|----------|--------------|----------|
| <b>Mother</b>                   | $P_M$ | $P_A$ | $P_M$ | $F_1$ | $F_1$    | $F_1$    | $P_M$    | $B_{1M}$     | $B_{1M}$ |
| <b>Father</b>                   | $P_M$ | $P_A$ | $P_A$ | $F_1$ | $P_A$    | $P_M$    | $F_1$    | $P_A$        | $P_M$    |
| <b>Egg/hatchling</b>            | $P_M$ | $P_A$ | $F_1$ | $F_2$ | $B_{1A}$ | $B_{1M}$ | $B_{1M}$ | $B_{1M}xP_A$ | $B_{2M}$ |
| <b>No. of mothers</b>           | 16    | 5     | 17    | 13    | 10       | 22       | 10       | 3            | 2        |
| <b>No. of clutches</b>          | 47    | 26    | 37    | 41    | 24       | 68       | 29       | 10           | 4        |
| <b>No. of eggs</b>              | 90    | 42    | 71    | 81    | 42       | 131      | 57       | 17           | 7        |
| <b>Temperature [°C]</b>         | 28    | 26    | 28    | 28    | 26       | 28       | 26       | 28           | 28       |
| <b>No. of incubated eggs</b>    | 87    | 38    | 70    | 55    | 16       | 16       | 15       | 106          | 18       |
| <b>No. of juveniles</b>         | 80    | 13    | 31    | 4     | 0        | 0        | 0        | 44           | 6        |
| <b>Egg hatchability (%)</b>     | 92    | 34    | 44    | 6     | -        | -        | 40       | 75           | 8        |
| <b>Survived to one year</b>     | 67    | 11    | 28    | 1     | 0        | 0        | 39       | 27           | 1        |
| <b>Survival rate (%)</b>        | 84    | 85    | 90    | 25    | -        | -        | 78       | 66           | 100      |
| <b>Sex ratio: Males/females</b> | 9/58  | 4/7   | 3/25  | 0/1   | 0/0      | 0/0      | 4/35     | 2/25         | 0/1      |

doi:10.1371/journal.pone.0143630.t001

were bred with conspecific unrelated males (with the exception of two *E. angramainyu* females, which were the daughters of the breeding male).

The animals were housed individually in glass terrariums 60 x 30 x 20cm or 30 x 30 x 20cm in size. The ambient temperature in the breeding room was about 28°C with permanent presence of basking cables under every terrarium to maintain a temperature gradient. The floor of each cage was covered with bark substrate. Paper shelters, as well as feeding and drinking dishes, were provided. During the laying season, containers with adequately humid coconut substrate for egg deposition were added. The geckos had continuous access to water and were fed crickets and mealworms dusted with vitamins and minerals (Nutri Mix) weekly; AD<sub>3</sub> and E vitamins were provided once per 14 days. The hatchlings were housed singly in plastic boxes 20 x 20 x 15cm and were fed solely the vitamins dusted crickets up to the three months of their age.

We studied the following nine categories of the parental species and their hybrids that are further referred to as follows (the abbreviations are given in parentheses; on the first place there is always an abbreviation for a female, then cross (x) with a male on the second position; the number and the sexes of these specimens in [Table 1](#)):

1.  $P_M$ —the parental generation of the *E. macularius*, both parents belong to the *E. macularius* (M);
2.  $P_A$ —the parental generation of the *E. angramainyu*, both parents belong to the *E. angramainyu* (A);
3.  $F_1$  —the first generation hybrid, a mother of the *E. macularius* and a father of the *E. angramainyu* (MA);
4.  $F_2$  —the second generation hybrid, both parents are  $F_1$  hybrids of the *E. macularius* and *E. angramainyu* (MAxMA);
5.  $B_{1A}$  —the first generation backcross with the *E. angramainyu*, a mother is an  $F_1$  hybrid and a father belongs to the *E. angramainyu* (MAxMA);

6.  $B_{1M}$  –the first generation backcross with the *E. macularius*, a mother is an  $F_1$  hybrid and a father belongs to the *E. macularius* (MAxM);
7.  $B_{1M}$  –the first generation backcross with the *E. macularius* (reciprocal to 6), a mother belongs to the *E. macularius* and a father is an  $F_1$  hybrid (MxMA);
8.  $B_{1M} \times P_A$  –a higher order hybrid, a mother is the  $B_{1M}$  hybrid (cf. 7) and a father belongs to the *E. angramainyu* ((MxMA)xA);
9.  $B_{2M}$  –the second generation backcross with the *E. macularius*, a mother is the  $B_{1M}$  hybrid (cf. 7) and a father belongs to the *E. macularius* ((MxMA)xM).

Respective to the nocturnal activity pattern of the geckos and their thermal preferences [103], the mating attempts were conducted in the evening (after 7 p.m.) in a temperature-controlled breeding room (28°C) illuminated by a single red 25-W light bulb. Prior to the experiment, the females were weighed and were controlled for their receptivity by a visual inspection of the follicular growth through the abdomen wall [93]. We gently placed the male into the female's terrarium for 30 min and we recorded the copulation behaviour using a night vision video camera. If mating did not occur within this interval, we repeated the trial the other day. The primary aim was to allow successful mating and to enable the production of fertilized eggs.

During the egg-laying season (since February to September), we controlled the egg-deposition containers for three times a week. The eggs were weighted and placed to the temperature-controlling incubator in plastic boxes, each containing a single clutch. We set the temperature to  $28.5 \pm 0.5^\circ\text{C}$ , which is an optimal and preferred incubation temperature in the *E. macularius* [97, 104, 105]. Nevertheless, according to our previous experience with the *E. angramainyu*, the successful development of their embryos require slightly lower temperatures and longer incubation time. At 28°C incubation temperature (an upper limit for successful incubation), some hatchlings possessed a prolapsed yolk pouch. After consultation with other experienced colleagues at this field (e.g. Lukáš Kratochvíl, Charles University), we set the incubation temperature to  $26 \pm 0.5^\circ\text{C}$  for the eggs laid by the *E. angramainyu*. The only feasible solution was to perform the experiments within the temperature range of 26–28°C, among which the incubation temperature overlaps in both species included in the experiment. Consequently, the eggs laid by the  $F_1$  hybrid females were initially incubated either at 26°C or at 28°C to compare the hybrid hatchability at the optimum incubation temperature for both parent species (at 26°C in *E. angramainyu* and at 28°C in *E. macularius*). The temperature was selected at random for the first clutch and then regularly switched in successive ones (see Table 1). In additional backcrossing of the  $F_1$  females with the *E. macularius* males in the breeding season 2013, which was aimed to prove their fertility, the incubation temperature was set to 28°C.

For every egg we took down the identity of the parents, the dates of laying and hatching, the weights of egg and hatchling and the incubation temperature. In order to perform formal tests of the hatchability, we used GLMs, in which the hatching of the incubated eggs of an individual clutch (number of hatchlings of one clutch and number of non-hatched eggs of the same clutch) was given as a dependent variable with binomial distribution and logit link function; the juvenile form, the incubation temperature and its interactions, and the clutch sequence were introduced as category explanatory variables. The calculations were performed in the R (R Development Core Team, Vienna, Austria).

Most eggs that have failed to hatch until the standard terms [106] were dissected to prove the presence and developmental stage of the embryos. Nevertheless, the content of many rotten eggs was entirely decayed, which precluded a reliable dissection. Thus, in many cases, we were unable to distinguish the fertilized eggs from those unfertilized.

The hatchlings were weighted and scanned (a ventral and a dorsal view of the body) in standardized positions. This procedure was repeated in adulthood at the age of 2–3 years. In order to provide a reference in the form additional fully grown individuals, the data set was supplemented with adult specimens of *E. macularius* from Pakistan and *E. angramainyu* from Iran (both wild-caught individuals and their descendants). In total, we collected 91 valid records for juveniles (*E. angramainyu*– 4 specimens, *E. macularius*– 32 spec., MA– 25 spec., MAxMA– 3 spec., MxMA– 11 spec., MAxM– 16 spec.) and 139 valid records for the animals older than two years (*E. angramainyu*– 10♀, 5♂, *E. macularius*– 55♀, 13♂), MA– 24♀, 3♂, MAxMA– 1♀, MxMA– 15♀, 2♂, MAxM– 7♀, 3♂, MMAxA– 1♀).

The coloration pattern analysis of the *E. angramainyu* (29 spec.), *E. macularius* (29 spec.), F<sub>1</sub> (28 spec.) and the B<sub>1M</sub> (27 spec.) hybrids we conducted on a dorsal view of the head. For this purpose, we examined the scans of the animals older than one year with fully developed adult coloration pattern (Fig 1, also in [97]). First, the scans were set to black and white colors (converted to Grayscale mode, then to Bitmap mode by 50% Threshold method in Adobe Photoshop CS2; Adobe Systems Incorporated, USA). The total number of dark (melanistic) spots and the length of the longest continuous spot were performed by UTHSCSA Image Tool (San Antonio, Texas). The area of the largest continuous dark spot was measured in ImageJ program (National Institutes of Health, USA) (Fig 2). All measurements were calibrated using a squared paper present in each scan.

To test the effect of species/hybrid category on the adult coloration pattern on the head, we analyzed the Number of spots (square-root transformed), Spot size (area of the largest spot scaled to the head size and natural log-transformed) and Spot length (length of the largest spot scaled to the head length and natural log-transformed) using linear models with the form of the animal (P<sub>M</sub>, P<sub>A</sub>, F<sub>1</sub>, B<sub>1M</sub>) as a factor. Post hoc Tukey tests were adopted to compare the factor levels. The calculations were performed using STATISTICA, version 6.0 (StatSoft Inc., Tulsa, USA).

For morphometric analyses we adopted and/or modified standard measurements from Kratochvíl et al. (2003) [107] and Frýdlová et al. (2011) [108]. We used the following 14 measurements that were measured by UTHSCSA Image Tool from digital images: (1) SVL–snout-vent length; (2) DEX1 –distance between the extremities (from the posterior margin of the front leg to the cloacal lips); (3) DEX2 –from the posterior margin of collar to the cloacal lips; (4) TW–tail width (the largest width of the tail); (5) UFL–upper fore-limb length; (6) CFW–chest and upper fore-limb width; (7) LFL–lower fore-limb length (without hand); (8) FL–middle finger length without the claw; (9) HHW–hip upper hind-limb width; (10) KHL–knee to heel length; (11) HL–head length (from rostrum to the posterior margin of collar); (12) HW–head width, the largest width of the head; (13) EEL–distance between anterior corners of eyes; (14) REL–rostrum to eye length, from tip of the snout to the anterior corner of eye. In case of juveniles we measured only SVL. For the definition of these measurements, see Fig 2.

In order to separate a shape component of the morphometric variation, we performed the size-adjustment of the original variables. For this purpose, we used the method published by Somers (1986, 1989) [109, 110] as implemented in the Size analysis v02 [111–113]. This software computes not only generalized (multivariate) isometric size of the original untransformed measurements, but also partial isometric size-adjusted measurements. These size-free data were further analyzed by a multivariate exploratory statistics as implemented in the discriminant function analysis (DFA) subroutine of STATISTICA, version 6.0. The data were checked for normality prior to the statistical analyses. Deviations from normality were small, and most distributions were both unimodal and symmetrical as required for the used multivariate procedures.

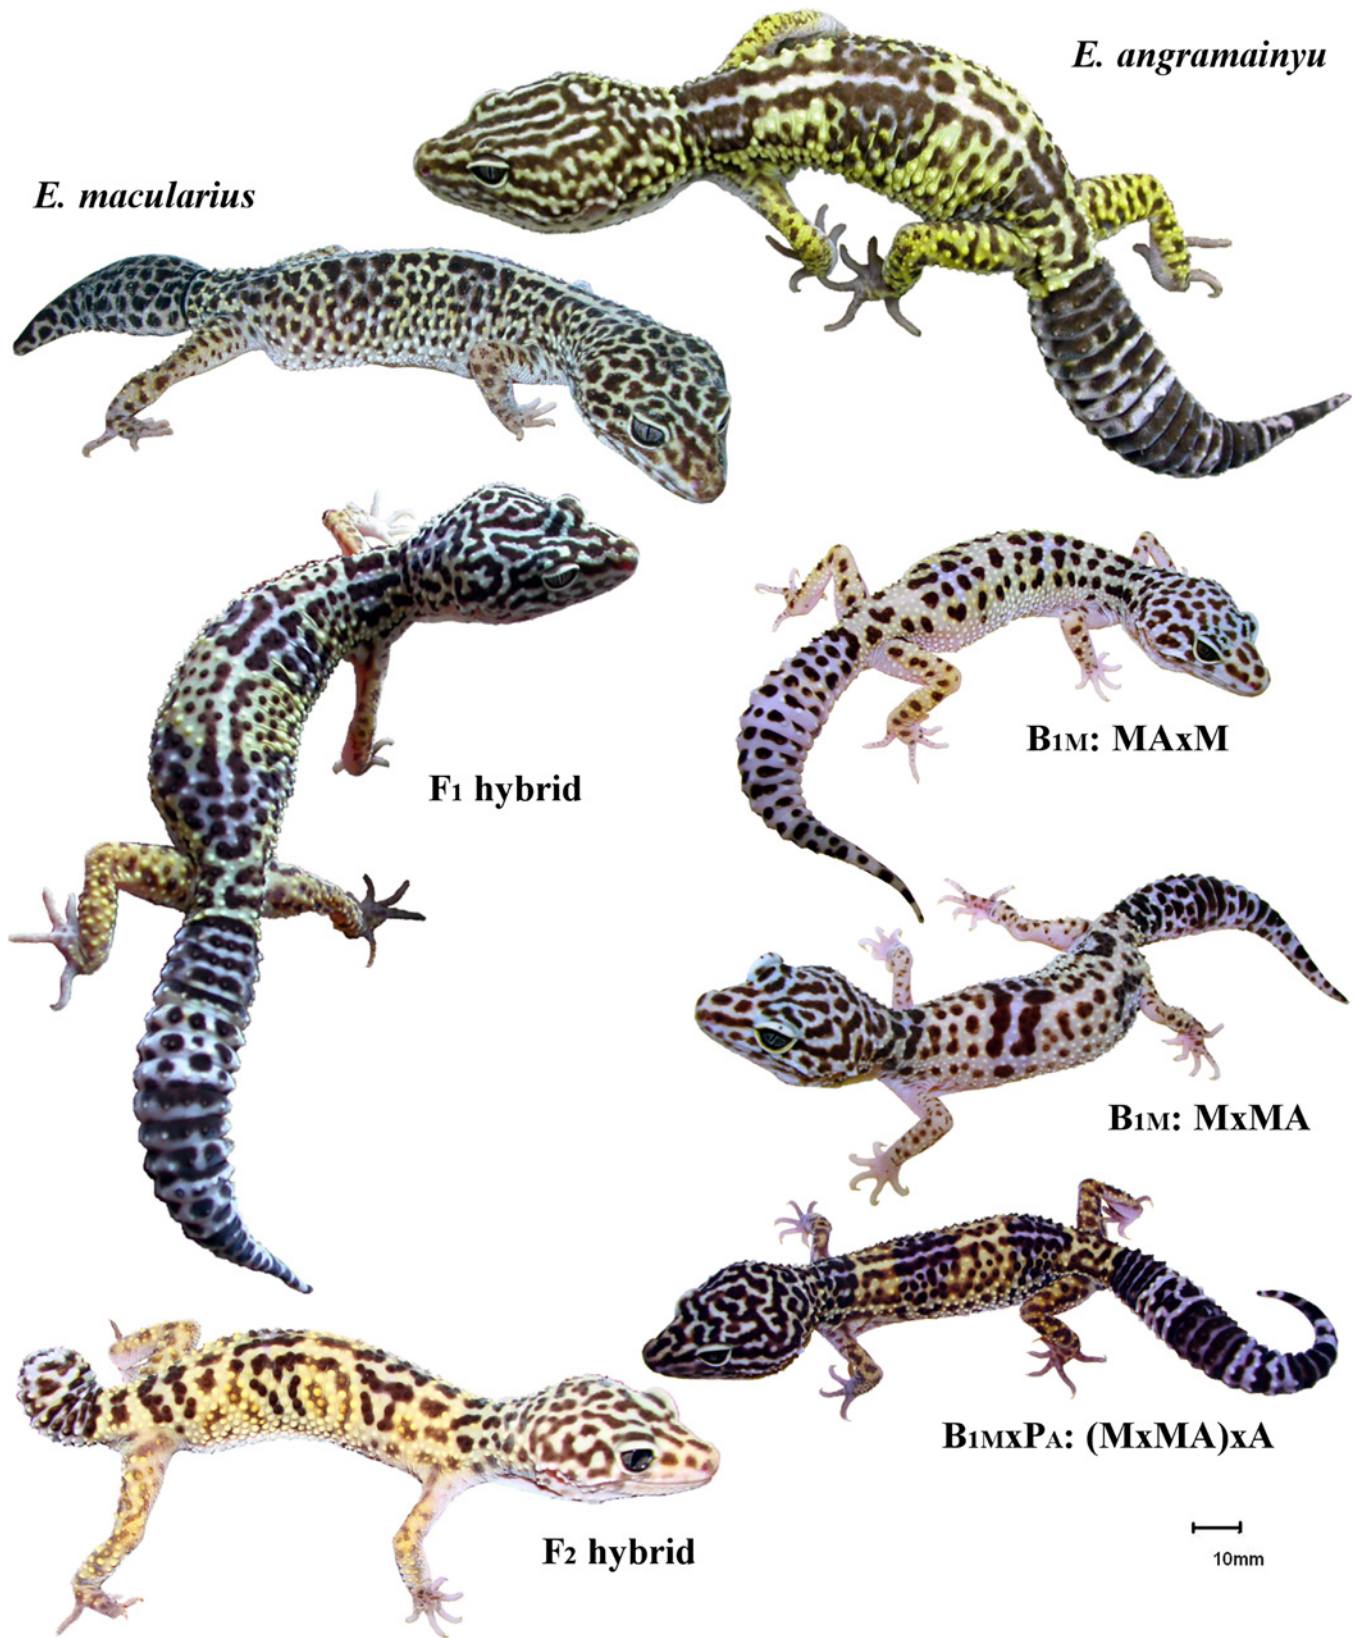



**Fig 1. The external appearance and coloration.** *E. macularius* ( $P_M$ ), *E. angramainyu* ( $P_A$ ), their hybrid of the first ( $F_1$ ) and second filial generations ( $F_2$ ), backcrosses of the  $F_1$  with male or female *E. macularius* ( $B_{1M}$ :  $MA \times M$  and  $B_{1F}$ :  $M \times MA$ , respectively), and a cross between a female of the latter backcross and a male of the *E. angramainyu* ( $B_{1M} \times P_A$ ). The scale bar used was 10mm.

doi:10.1371/journal.pone.0143630.g001

## Results

### Mating success, fertility, hatching success and survival of hybrids

During five breeding seasons, the breeding male of the *E. angramainyu* was successively paired with 17 virgin females of the *E. macularius*. 15 of these females subsequently produced eggs. Since at least one egg of each female hatched, all these females were successfully fertilized by heterospecific matings. The hatchability of the  $F_1$  hybrids was 44% ( $n = 70$  incubated eggs at  $28^\circ\text{C}$ ); this value resembles that of the *E. angramainyu* (34%,  $n = 38$ ,  $26^\circ\text{C}$ ), but is still apparently lower than in *E. macularius* (92%,  $n = 87$ ,  $28^\circ\text{C}$ ). 25 females and 3 males of 31  $F_1$  hatchlings survived to the age of one year (90%). The survival rate was similar to those recorded in the parental species (*E. macularius* 84%, *E. angramainyu* 85%,  $n = 80$  and 13, respectively). These  $F_1$  hybrids were further bred to obtain  $F_2$  and/or  $B_1$  generations (for hatching success, survival and other details of hybridization experiments, see [Table 1](#)).

In order to obtain  $F_2$  hybrids, three  $F_1$  hybrid males were consecutively paired with 13  $F_1$  hybrid virgin females (six, five and two females with respective males). Each of these 13 females copulated and laid eggs. We incubated 71 eggs (16 eggs from 12 clutches at  $26^\circ\text{C}$  and 55 eggs from 29 clutches at  $28^\circ\text{C}$ ), nevertheless, only four eggs from three different  $F_1$  hybrid females hatched. All these  $F_2$  hybrid hatchlings were sired by a single male and incubated at  $28^\circ\text{C}$  (hatchability = 6%; no significant effect of temperature on hatchability was detected by Fisher exact test:  $P = 0.5680$ ). Only one  $F_2$  hybrid hatchling, a female, survived to the age of one year ([Fig 1](#), see its inborn malformation of the tail). None of the 18 eggs (nine clutches from five females) that were subsequently examined contained a macroscopically visible embryo.

The other 11  $F_1$  hybrid virgin females, as well as the six  $F_1$  females that failed to produce  $F_2$  or  $B_1$  hybrids in the previous breeding season were backcrossed with males of the *E. angramainyu* or *E. macularius*. Ten of them (six virgins) were allowed to copulate with the breeding male of the *E. angramainyu*, fertility of which was proved by previous breeding records. Each female laid one egg at least. As in the case of  $F_2$  hybrids, the eggs were incubated either at  $26^\circ\text{C}$  (15 eggs of 10 clutches) or  $28^\circ\text{C}$  (16 eggs of 14 clutches). Nevertheless, no juveniles hatched. Moreover, 15 of these eggs (nine clutches from six females) were later dissected and none of them contained a macroscopically visible embryo.

Six of the seven  $F_1$  hybrid females (five virgin) that copulated with three males of the *E. macularius* (three, two and two females, respectively; fertility of these males was proved by previous breeding records) laid eggs and at least five of them were fertile (83%, four of them produced viable offspring, while the remaining fertile female produced just fully developed embryos that failed to hatch). The incubation temperature was randomly set either to  $26^\circ\text{C}$  (18 eggs from 10 clutches) or  $28^\circ\text{C}$  (17 eggs from 9 clutches) and then regularly switched in successive clutches of the female. In a sharp contrast with the negative results of the reverse backcrossing with *E. angramainyu* described above, 15 of these 36 eggs hatched (43% hatchability; six hatchlings at  $26^\circ\text{C}$  and nine ones at  $28^\circ\text{C}$ , no significant effect of temperature on hatchability was detected by the Fisher exact test:  $P = 0.3145$ ). Three males and eight females survived to the age of one year (73% survival). Additional four dead embryos that failed to hatch (all from  $26^\circ\text{C}$ ) were found inside 16 dissected eggs belonging to ten clutches produced by five  $F_1$  hybrid females.

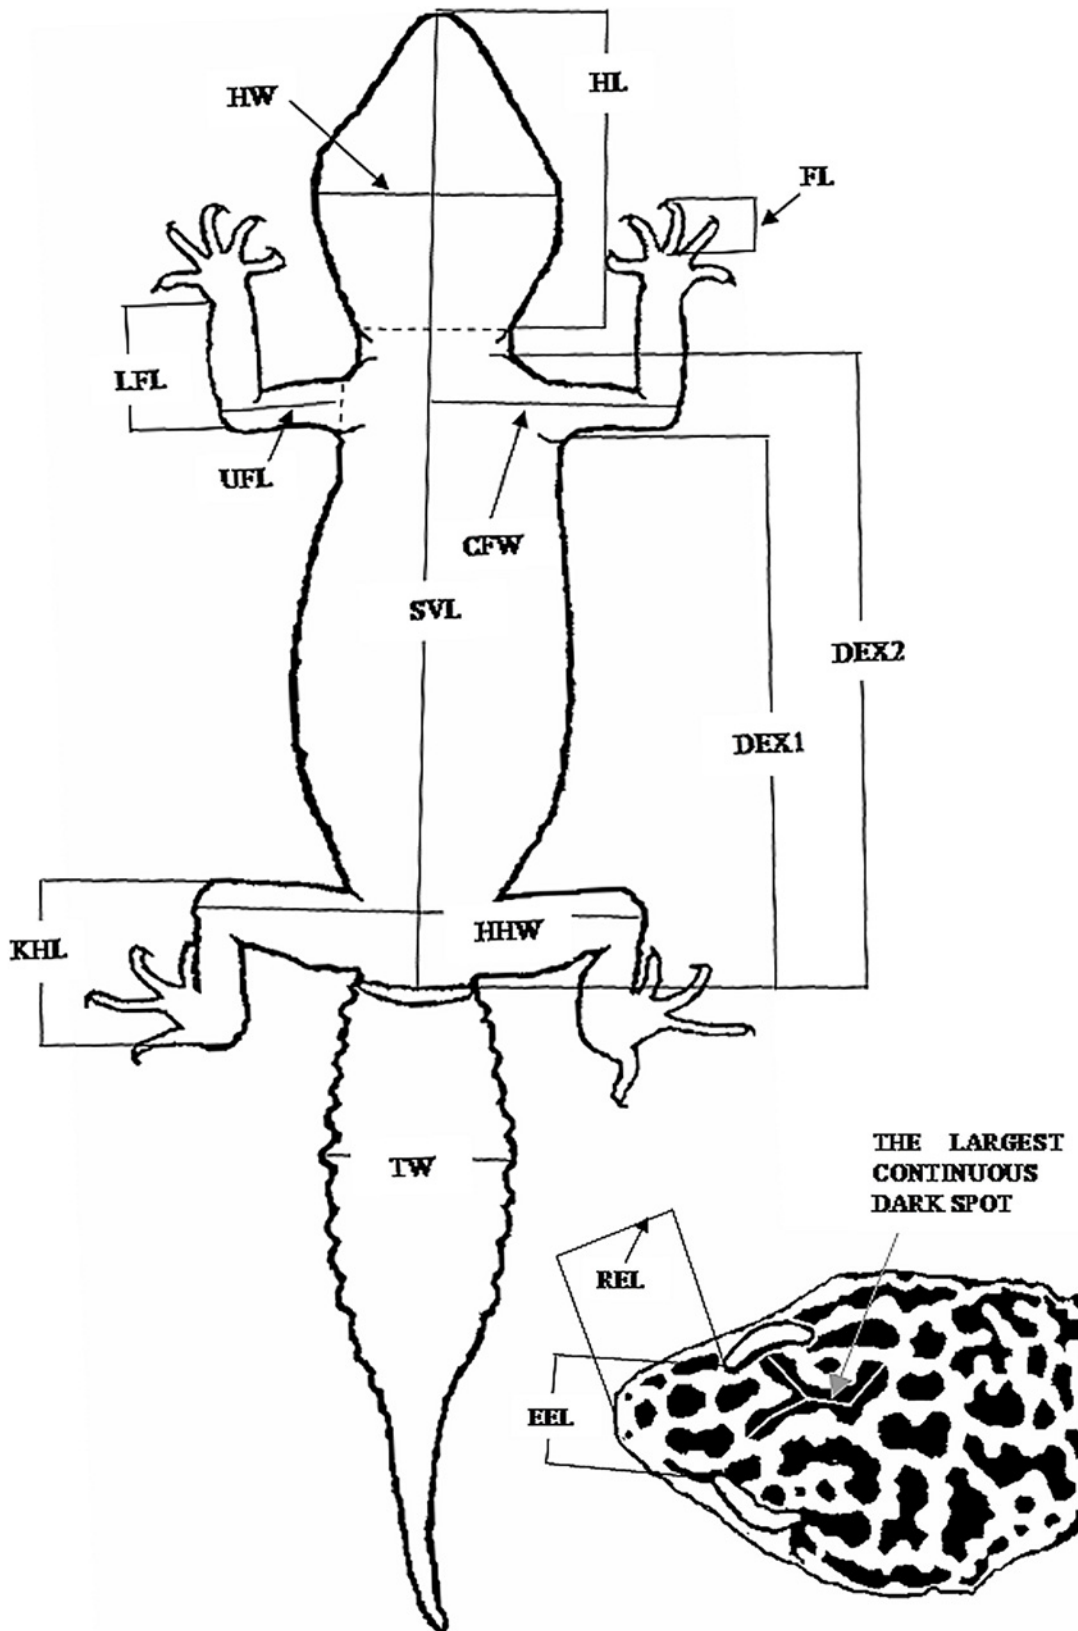

**Fig 2. Measurements of the body and the head.** SVL: snout-vent length; DEX1: from the margin of the front leg to the cloacal lips; DEX2: from the margin of collar to the cloacal lips; TW: tail width; UFL: upper fore-limb length; CFW: chest and upper fore-limb width; LFL: lower fore-limb length; FL: finger length; HHW: hip upper hind-limb width; KHL: knee to heel length; HL: head length; HW: head width; EEL: length between eyes; REL: rostrum to eye length; the largest spot: length and area was measured; the number of spots was computed.

doi:10.1371/journal.pone.0143630.g002

To prove their fertility, 17 F<sub>1</sub> females that failed to produce F<sub>2</sub> or B<sub>1</sub> hybrids in the previous experiments with effect of the incubation temperature were backcrossed again with males of the *E. macularius* in the breeding season in 2013. The eggs were incubated at 28°C only. Each female laid at least one egg and 12 of them appeared fertile (71%). Out of the 89 eggs belonging to the 49 clutches, 35 juveniles successfully hatched (hatchability = 39%). 28 of them (80%) survived up to the age of 12 months (one male and 27 females). Taken together with the above data, 16 of the 24 F<sub>1</sub> hybrid females (67%) were unambiguously fertile.

Ten females of the *E. macularius* were allowed to copulate with one of three F<sub>1</sub> hybrid males (five, two and three females with respective males). Nine of these females produced eggs, 55 eggs were incubated at 28°C and 41 juveniles hatched successfully (75% hatchability); 27 hatchlings (two males and 25 females) survived to adulthood (66% survival).

In order to test the fertility of the B<sub>1</sub> hybrids, three females MxMA were crossed with a male *E. angramainyu*. They produced 17 eggs; 13 eggs were incubated at 28°C and only one juvenile hatched (8%) and survived to the age of one year. Another two females MxMA were crossed with *E. macularius* males and they laid seven eggs, six of which were incubated at 28°C and one egg failed. Half of the eggs hatched but only one juvenile survived to adulthood.

To compare the incubation success (hatchability) in paternal species and the available categories of hybrids, we adopted a marginal model (geeglm function, family = binomial, logit link) accounting for an identity of the mother. The model revealed a significant variation of the incubation success among the examined groups (species and categories of hybrids; df = 8,  $\chi^2 = 76.2$ ,  $P < 0.0001$ ; Table 2). The incubation success of the *E. macularius* was significantly higher than those found in every other examined groups.

Most of the hatchlings successfully survived up to the age of one year; 84% of *E. macularius* (67 of 80), 85% of *E. angramainyu* (11 of 13), 90% of F<sub>1</sub> hybrids (28 of 31) and 72% of pooled categories of F<sub>2</sub>, B<sub>1</sub> and higher order hybrids (68 of 95). The variation in the survival rate among these groups approached significance (glm, binomial response variable, logit link,  $\chi^2 = 7.2$ , df = 3,218,  $P = 0.0666$ ).

**Table 2. The effects of hybridization on the incubation success (hatchability) of the *E. macularius*, *E. angramainyu*, and their hybrids.** Hybridization crossing - factor group; hatchability - binomial response variable comparing hatched and failed eggs of each clutch. Coefficients (Estimate), its Standard errors (SE), Wald statistics (Wald) and significance of treatment contrasts against reference group *E. macularius* (P) are provided. The marginal model (geeglm function, logit link) accounts for a mother's identity to avoid the problem of pseudoreplications. See Table 1 for explanations of the Generation and Crossing abbreviations.

| Generation                      | Crossing abbreviation | Estimate | SE     | Wald  | P        |
|---------------------------------|-----------------------|----------|--------|-------|----------|
|                                 | Intercept             | 2.4178   | 0.5614 | 18.55 | < 0.0001 |
| P <sub>A</sub>                  | A                     | -3.0041  | 0.7237 | 17.23 | < 0.0001 |
| F <sub>1</sub>                  | MA                    | -2.6733  | 0.6359 | 17.67 | < 0.0001 |
| B <sub>1M</sub>                 | MxMA                  | 0.4566   | 1.1785 | 0.15  | 0.6984   |
| B <sub>1A</sub>                 | MAxA                  | -5.7987  | 1.0526 | 30.35 | < 0.0001 |
| B <sub>1M</sub>                 | MAxM                  | -2.732   | 0.8005 | 11.65 | 0.0006   |
| F <sub>2</sub>                  | MAxMA                 | -5.1546  | 0.8501 | 36.76 | < 0.0001 |
| B <sub>1M</sub> xP <sub>A</sub> | (MxMA)xA              | -4.9868  | 0.8518 | 34.27 | < 0.0001 |
| B <sub>2M</sub>                 | (MxMA)xM              | -2.4178  | 0.5614 | 18.55 | < 0.0001 |

doi:10.1371/journal.pone.0143630.t002

### Morphology of the hybrids

The parental species as well as the F<sub>1</sub> hybrids exhibit distinct features of a physical appearance including the coloration pattern, body size and shape (for details, see Fig 1). We further examine these traits separately.

**Coloration pattern.** The typical patterns of dark spots on the head of adult individuals differ markedly between the *E. angramainyu* and *E. macularius*. Large elongated longitudinal spots prevail in the former species, while the presence of numerous, but smaller and rounded spots in the latter one. We examined the number of dark spots as well as the size of the largest one in both parental species and their F<sub>1</sub> and B<sub>1M</sub> hybrids (Table 3). ANOVAs revealed a highly significant variation among these groups in both these traits (F<sub>3, 109</sub> = 38.4, P < 0.0001 and F<sub>3, 107</sub> = 28.9, P < 0.0001, respectively). The mean values for hybrids were between those of the parental species; F<sub>1</sub> hybrids were closer to the *E. angramainyu* in this respect; the B<sub>1M</sub> hybrids exhibited values closer to those of the *E. macularius* (Fig 3).

**Body size.** Body size of the *E. angramainyu* is considerably larger than in the *E. macularius* and this difference is demonstrable both in adults and hatchlings (Figs 4 and 5). Consequently, ANOVAs revealed that the snout-vent length (SVL) varied significantly among of the examined species and their hybrids (F<sub>4, 132</sub> = 44.05 and F<sub>5, 97</sub> = 14.42 for adults and hatchlings, respectively; both P < 0.0001). Post hoc tests distinguished two homogenous groups (at α = 0.05; Ps of all significant comparisons are < 0.0001) according to the adult body size; the one containing the *E. angramainyu* and F<sub>1</sub> hybrids, and the other one consisting of the *E. macularius* and their B<sub>1M</sub> hybrids. Also, the body size of the only F<sub>2</sub> hybrid that survived to adulthood (SVL 129.5mm) was close to the values of the *E. macularius*. The corresponding comparisons of the hatchling body size revealed that the *E. angramainyu* were larger than the *E. macularius* (P = 0.0001) and the hybrids (F<sub>1</sub>, F<sub>2</sub>, both types of B<sub>1M</sub>; Ps = 0.0002, 0.0029, 0.0008 and 0.0002, respectively). Moreover, the *E. macularius* hatchlings were slightly, but significantly smaller than both F<sub>1</sub> (P = 0.0373) and a specific category of the B<sub>1M</sub> hybrids (MAxM, i.e., descendants of F<sub>1</sub> females; P = 0.0115).

**Body shape.** Canonical variate analysis (CVA) performed on size-adjusted measurements revealed that the body shape differed markedly among the *E. macularius*, *E. angramainyu* and their F<sub>1</sub> hybrids (Fig 6). The first canonical axis discriminating the *E. macularius* from the *E. angramainyu* may be interpreted as a relative length of limbs (the latter species possessing longer limbs; correlations between this axis and limb measurements were: -0.469, -0.353, -0.309, -0.378, and -0.319 for the lengths of femur, tibia, humerus, ulna, and middle finger, respectively), while the second canonical axis discriminating the F<sub>1</sub> hybrids from the parental species correlated with the snout-vent length (r = 0.594) and head width (r = 0.307). The discriminant function analysis (DFA; Wilks' Lambda = 0.178, F<sub>30, 214</sub> = 9.76, p < 0.0001) revealed that the

**Table 3. Means and Standard errors (SE) for Number of spots on the head, Spot size and Spot length in the *E. angramainyu* (P<sub>A</sub>), *E. macularius* (P<sub>M</sub>), and their F<sub>1</sub> and B<sub>1M</sub> hybrids.** Number of spots on the head—square root transformed, Spot size—area of the largest spot scaled to the head size and natural log-transformed, and Spot length—length of the largest spot scaled to the head length and natural log-transformed. In the case of the Number of spots, post hoc Tukey tests at P < 0.05 were significant for all comparisons. The same procedure revealed two homogenous groups (*E. angramainyu* and F<sub>1</sub>; *E. macularius* and B<sub>1M</sub>) for the Spot area and Spot length. N—number of animals in the testing group.

| Group           | Number of spots |       |       | Spot size |        |       | Spot length |       |
|-----------------|-----------------|-------|-------|-----------|--------|-------|-------------|-------|
|                 | N               | Mean  | SE    | N         | Mean   | SE    | Mean        | SE    |
| P <sub>A</sub>  | 29              | 2.669 | 0.203 | 29        | -2.045 | 0.134 | 1.192       | 0.132 |
| F <sub>1</sub>  | 28              | 3.618 | 0.139 | 28        | -2.254 | 0.117 | 0.911       | 0.111 |
| B <sub>1M</sub> | 27              | 4.731 | 0.246 | 27        | -3.208 | 0.167 | 0.041       | 0.149 |
| P <sub>M</sub>  | 29              | 5.767 | 0.257 | 27        | -3.551 | 0.123 | -0.182      | 0.104 |

doi:10.1371/journal.pone.0143630.t003

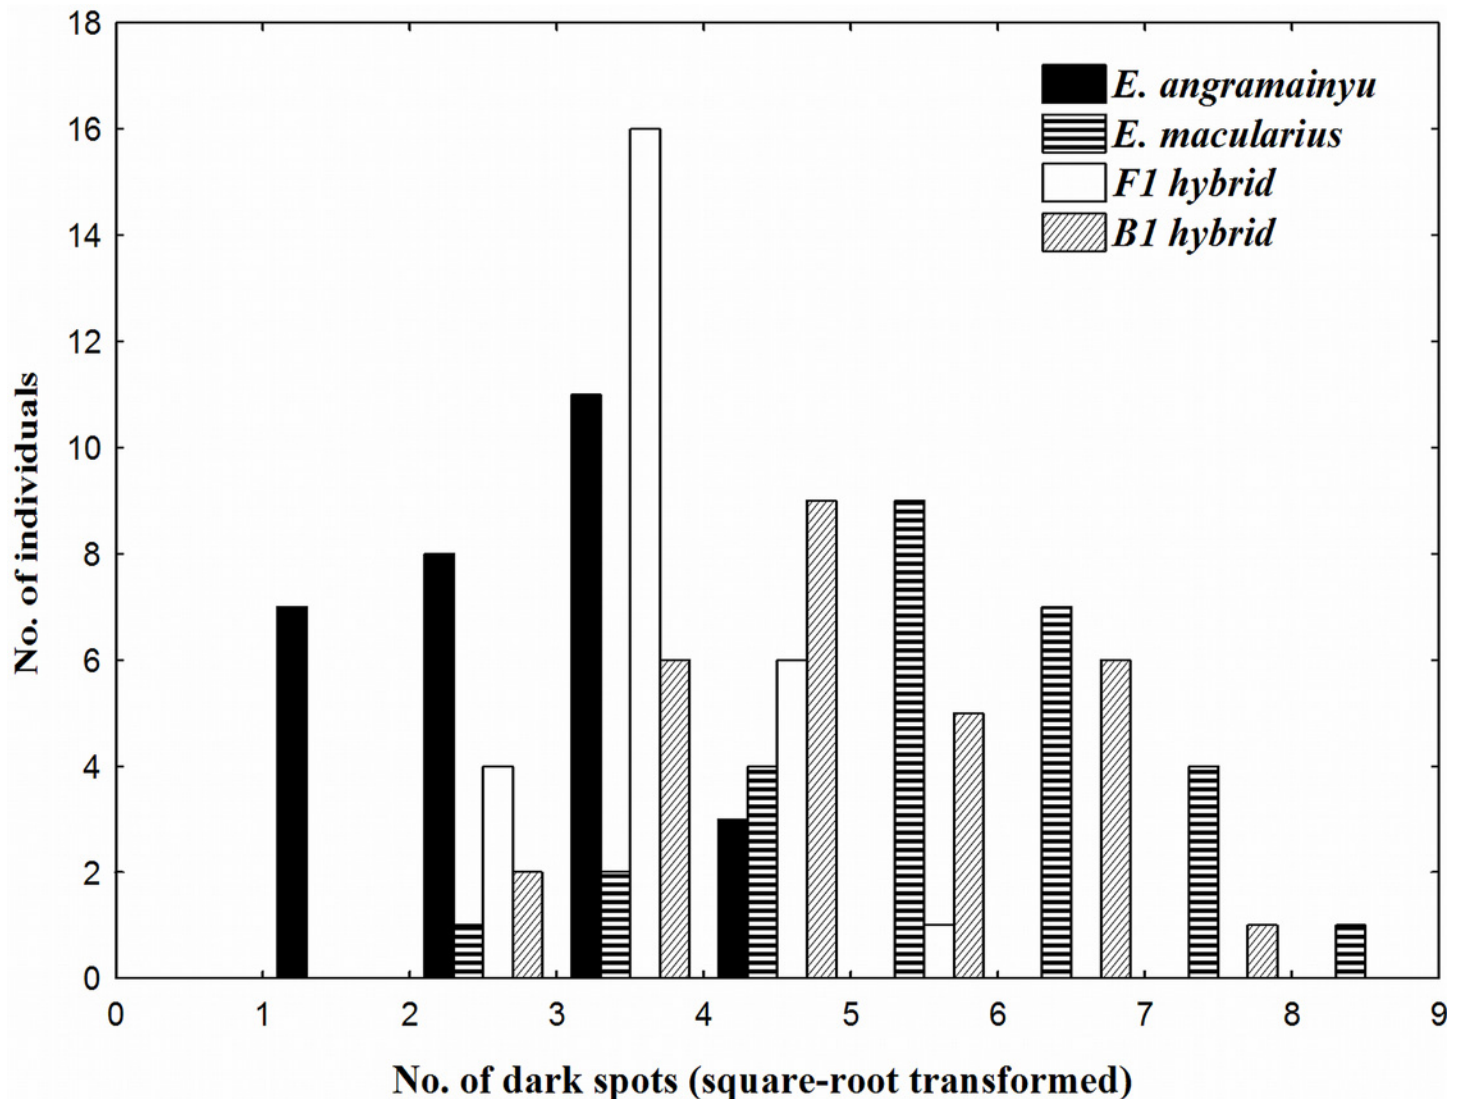

**Fig 3. Variation in the number of dark spots on head.** *E. angramainyu*, *E. macularius*, and their F<sub>1</sub> and B<sub>1M</sub> hybrids. The number of spots was square-root transformed.

doi:10.1371/journal.pone.0143630.g003

overall reclassification success was high (87%), only one of the 29 individuals of the *E. angramainyu* and two of the 68 individuals of the *E. macularius* were assigned to the opposite species according to their body shape. Out of the 27 F<sub>1</sub> hybrids, seven were erroneously assigned to the *E. macularius* and only one to the *E. angramainyu* (see Table 4). Application of the above discriminant functions to the backcrosses and higher order hybrids showed that only one of these animals was classified as an F<sub>1</sub> hybrid; the others were classified either as the *E. macularius* (20 cases) or as the *E. angramainyu* (9 cases).

## Discussion

### Hybridization success

We demonstrated that the attempts to cross an *E. macularius* with an *E. angramainyu* regularly result in successful copulations, production of fertilized eggs and well-developed hatchlings.

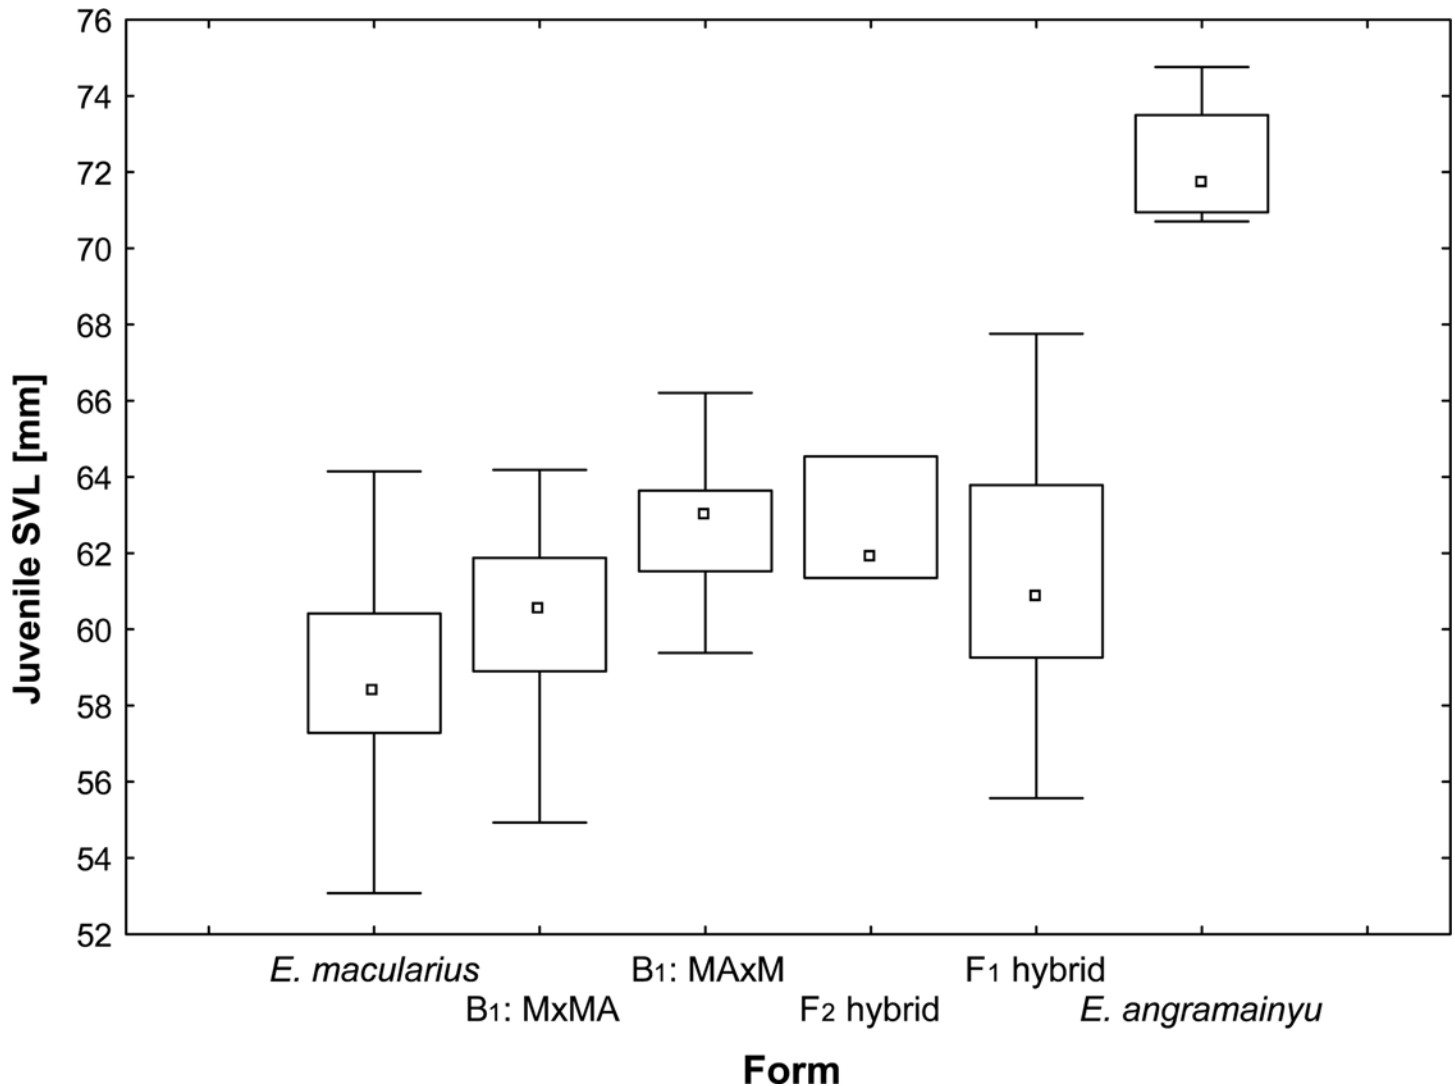

**Fig 4. Box plots of hatchling snout-vent lengths.** *E. macularius* (n = 32), *E. angramainyu* (n = 4), their hybrids of the first (F<sub>1</sub>; n = 25) and second (F<sub>2</sub>; n = 3) filial generations and the reciprocal backcrosses of F<sub>1</sub> males or females to the *E. macularius* (B<sub>1M</sub>; the individuals with father F<sub>1</sub> hybrid are denoted as MxMA, while those with the mother F<sub>1</sub> hybrid as MAxM; n = 11 and 16, respectively). Median, quartiles and ranges are provided.

doi:10.1371/journal.pone.0143630.g004

Considering that both geological and genetic evidence suggest that the divergence of the *E. macularius* and *E. angramainyu* lasted at least 12–15 million years (see under [Introduction](#)), even the ability to produce healthy F<sub>1</sub> hybrids is remarkable. Comparably, divergent species of mammals are typically unable to produce F<sub>1</sub> hybrids (but see [\[114, 115\]](#)). Thus, our results in the eyelid geckos fit the slow (“avian”) rather than the rapid (“mammalian”) rate of the evolution of postzygotic RIMs [\[44, 47\]](#).

Not the ability to produce F<sub>1</sub> hybrids, but especially the fertility of the hybrids usually determines the evolutionary consequences of hybridization. Bolonick and Near (2005) [\[34\]](#) demonstrated in centrarchid fishes that the divergence time of species still able to produce fertile hybrids was two times shorter than that of those able to produce viable, but sterile F<sub>1</sub> hybrids (15 versus 34 million years, respectively, in a similar way in birds [\[116\]](#)).

In our experiments, most of the F<sub>1</sub> hybrids of the *E. macularius* and *E. angramainyu* appeared fertile when backcrossed with the *E. macularius* (see [Table 1](#)). Also, at least two from

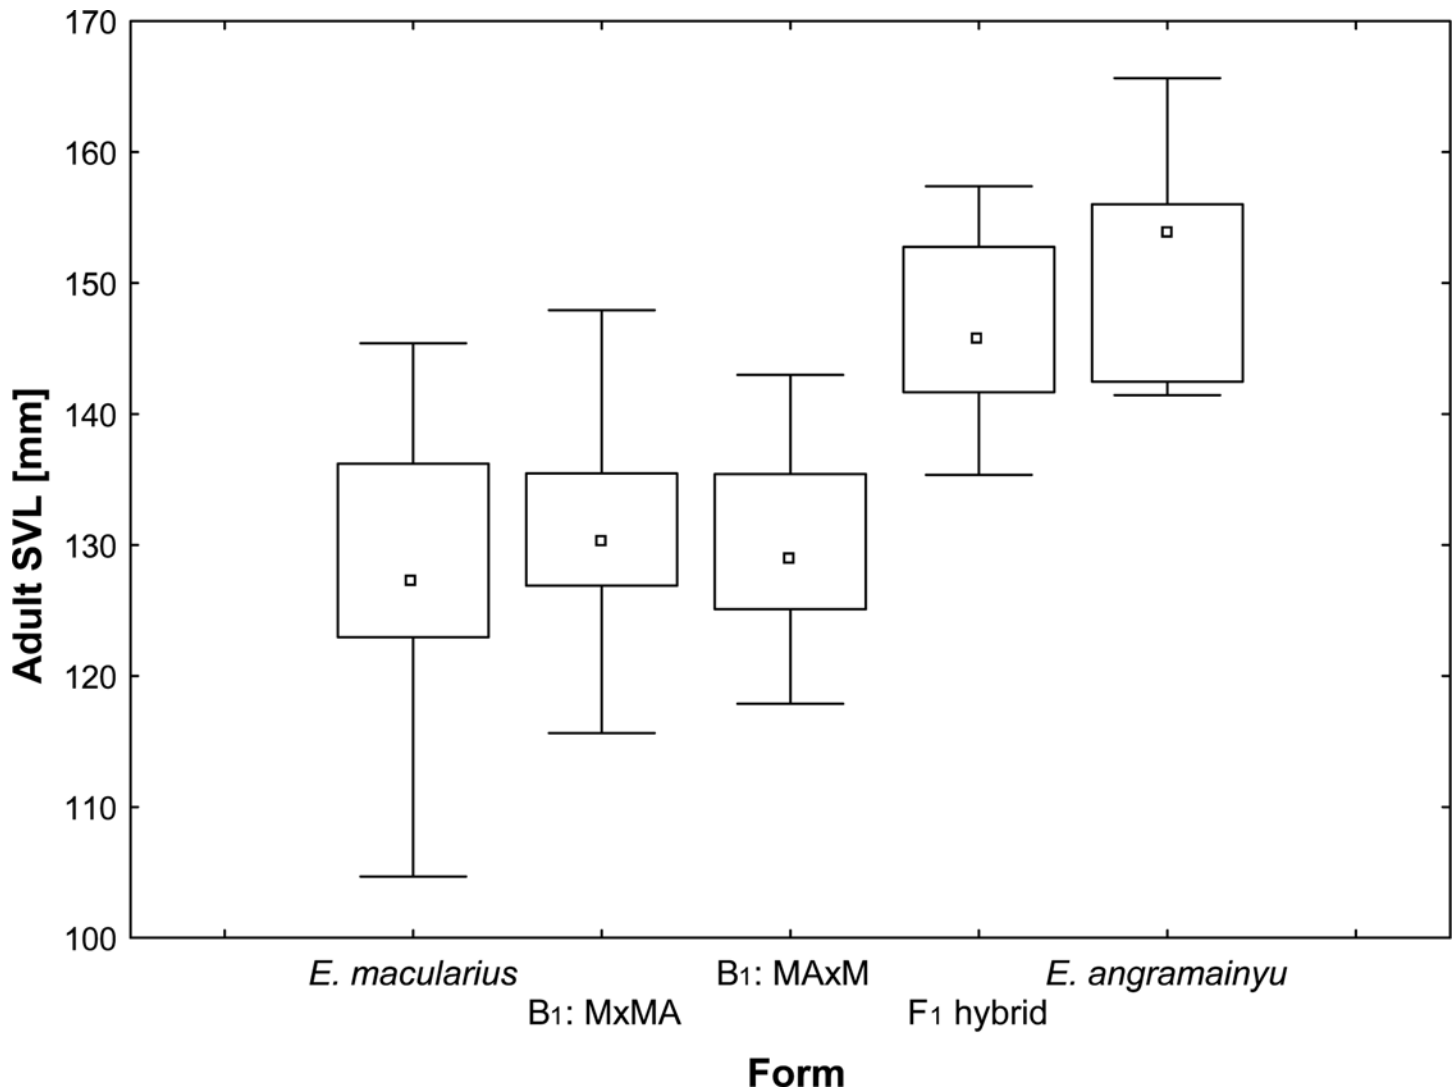

**Fig 5. Box plots of adult snout-vent lengths.** *E. macularius* (n = 68), *E. angramainyu* (n = 15), their hybrids of the first filial generation (F<sub>1</sub>; n = 27), and its reciprocal backcrosses of F<sub>1</sub> males or females to the *E. macularius* (B<sub>1M</sub>; the individuals with the father F<sub>1</sub> hybrid are denoted as MxMA, while those with the mother F<sub>1</sub> hybrid as MAxM; n = 10 and 17, respectively). Median, quartiles and ranges are provided.

doi:10.1371/journal.pone.0143630.g005

the five resulting backcrosses were fertile. Thus, low success of attempts to produce F<sub>2</sub> hybrids should be attributed to genetic incompatibility rather than to sterility of the F<sub>1</sub> hybrids. This conclusion also concerns the failed backcrossing to the *E. angramainyu* (see Table 1). In this case, successful copulations initiated laying of eggs, which failed to develop and contained no macroscopically detectable embryos. The likely cause is a defect of either fertilization or early development. The asymmetric pattern of incompatibilities allowing backcrossing of the F<sub>1</sub> hybrids solely to the *E. macularius* is remarkable, but not exceptional. Such asymmetries fit the predictions of some genetic theoreticians [117] and were also previously reported from experiments performed in other animal taxa (e.g., fishes [118], amphibians [119, 120], lizards [69, 121], insects [122]).

Because we have only one breeding male *E. angramainyu*, the failed backcrossing to the *E. angramainyu* could be due to mating between close relatives, F<sub>1</sub> hybrid daughters with the *E. angramainyu* father, respectively. Similarly, the low success of producing F<sub>2</sub> hybrids could be

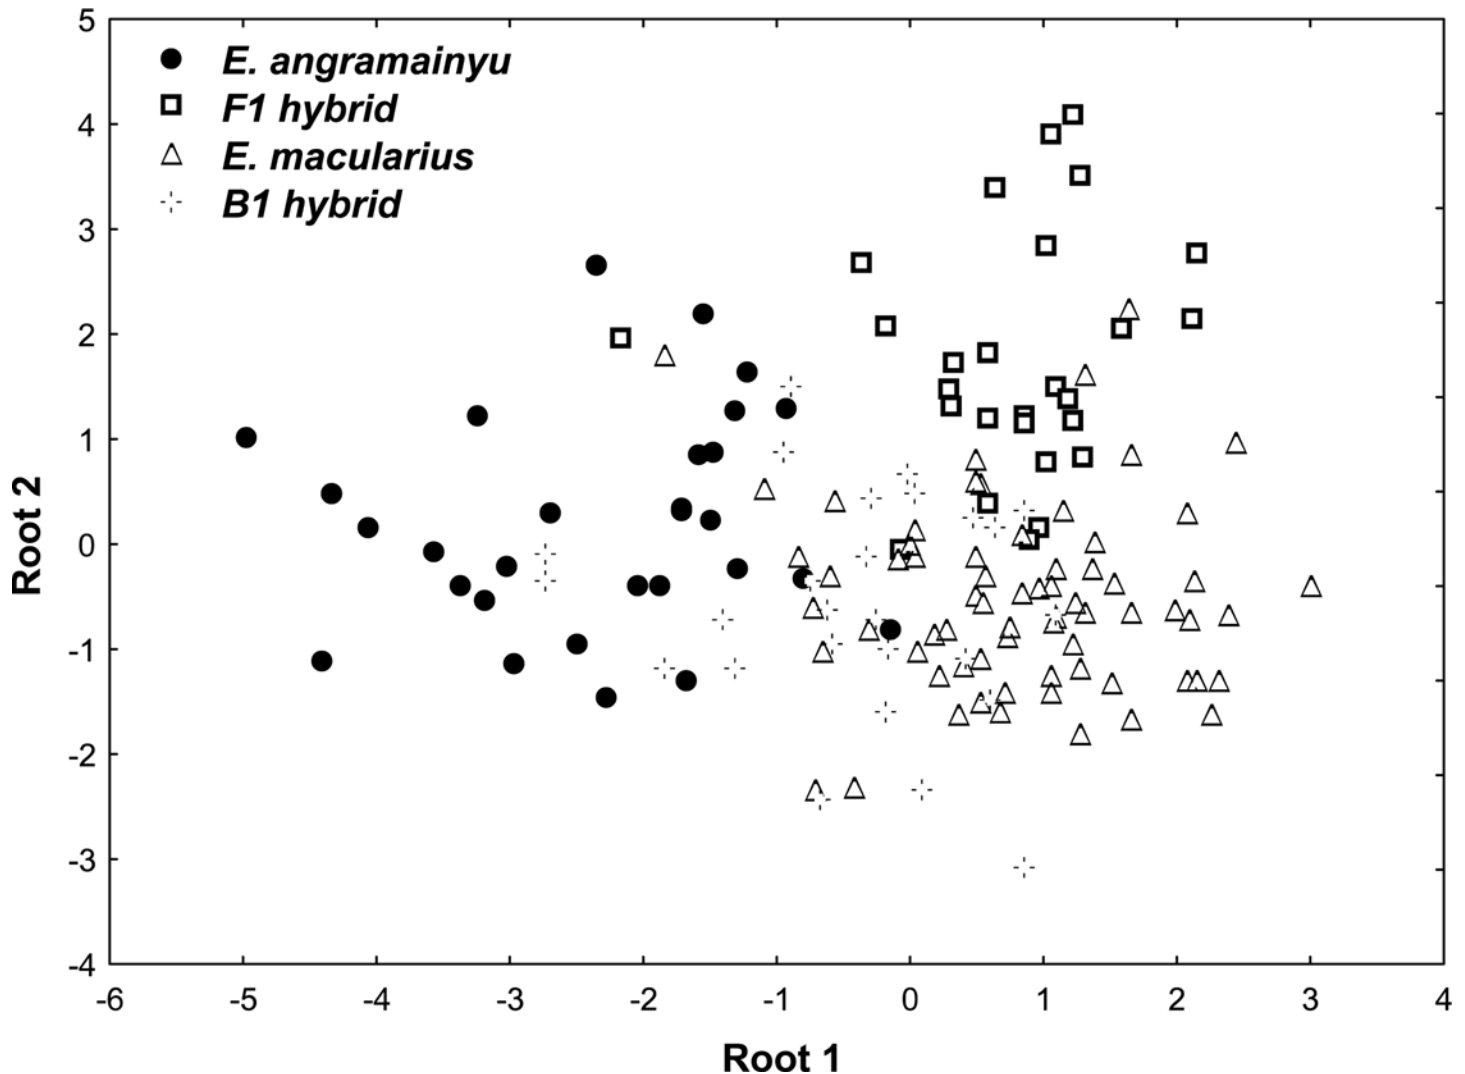

**Fig 6. Results of canonical variate analysis extracting multivariate axes (roots 1 and 2).** The results discriminated the *E. macularius*, *E. angramainyu*, and their F<sub>1</sub> hybrids from 15 size-adjusted morphometric traits. Backcrosses of the F<sub>1</sub> hybrids with the *E. macularius* were also projected into this morphospace.

doi:10.1371/journal.pone.0143630.g006

determined by the breeding of siblings. On the other hand, the strong inbreeding impact on the fitness in the first generation of the relative breeding in lizards was supported neither by the studies in the literature [123], nor by our own experience with the breeding of closely related animals of the *E. macularius*. In case of the Swedish sand lizard, Olsson et al. (2002) demonstrated that the sand lizards produce malformed offspring often when they mate with siblings. However, there is low level of genetic variation and there are monitored similarly malformed offspring in this natural population too (up to 10%) [124]. The higher incidence of the malformed offspring through the mating of siblings is probably the result of inbreeding depression of entire population.

The observed difference in hatching success between the parental species (92% in *E. macularius* and 34% in *E. angramainyu*) considerably limits the interpretation of the quantitative differences in hatchability between the parental species and their hybrids. The lower hatching success of the *E. angramainyu* may be attributed to suboptimal incubation conditions. The



**Table 4. Results of the discriminant function analysis (DFA) on 15 size-adjusted morphometric traits.** The *E. macularius*, *E. angramainyu*, and their F<sub>1</sub> hybrids were included in the analysis. Resulting discriminant functions were then applied to the reclassification of these animals as well as additional ones belonging to other categories of their hybrids into these three groups. The numbers indicate assignment of the individual as predicted by DFA. Generation and Crossing abbreviation = see Table 1. No. of examined individuals = the observed number of animals belonging to each category; Reclassification success = percent of individuals assigned to a correct group.

| Generation                      | Crossing abbreviation | Reclassification success [%] | P <sub>A</sub> <i>E. angramainyu</i> | F <sub>1</sub> hybrid | P <sub>M</sub> <i>E. macularius</i> | No. of examined individuals |
|---------------------------------|-----------------------|------------------------------|--------------------------------------|-----------------------|-------------------------------------|-----------------------------|
| P <sub>A</sub>                  | A                     | 93                           | 27                                   | 1                     | 1                                   | 29                          |
| F <sub>1</sub>                  | MA                    | 70                           | 1                                    | 19                    | 7                                   | 27                          |
| P <sub>M</sub>                  | M                     | 91                           | 2                                    | 4                     | 62                                  | 68                          |
| F <sub>2</sub>                  | MAxMA                 | -                            | 0                                    | 0                     | 1                                   | 1                           |
| B <sub>1M</sub>                 | MxMA                  | -                            | 3                                    | 0                     | 14                                  | 17                          |
| B <sub>1M</sub>                 | MAxM                  | -                            | 5                                    | 1                     | 4                                   | 10                          |
| B <sub>2M</sub>                 | (MxMA)xM              | -                            | 1                                    | 0                     | 0                                   | 1                           |
| B <sub>1M</sub> xP <sub>A</sub> | (MxMA)xA              | -                            | 0                                    | 0                     | 1                                   | 1                           |

doi:10.1371/journal.pone.0143630.t004

optimization of the incubation temperature of this little known species would need huge number of eggs and would require a separate long-term study. Consequently, it is difficult to distinguish between the additive effects of genes and the effects resulting from the incompatibility of genes originating from different parental species that are present in hybrids. On the other hand, it has not shown that the different optimal incubation temperature of the parental species (26°C or 28°C in this study) would affect the hatchability of the eggs produced by the F<sub>1</sub> hybrid females.

Due to an extreme rarity of the *E. angramainyu*, it was impossible to obtain those combinations of reciprocal crosses involving females of this parental species. Nevertheless, in the genus *Eublepharis*, males are genetically fully equivalent to females due to the presence of temperature sex determination (TSD, [125–127]). This genetic equality of the sexes, however, does not mean an exclusion of the maternal effects and/or sex biased effects of DMIs.

In spite of the difficulties to produce F<sub>2</sub> hybrids of the *E. macularius* and *E. angramainyu* and the failed backcrossing of the F<sub>1</sub> hybrids with the *E. angramainyu*, the successful backcrossing of the F<sub>1</sub> hybrids with the *E. macularius* provides a theoretical possibility for introgression of the *E. angramainyu* genes into the populations of the *E. macularius*. This suggests that postzygotic RIMs between these distinct species have not been completed.

Another aspect of successful hybridization is the viability, developmental stability and health of the hybrids. As repeatedly demonstrated in many model taxa [22, 34, 53, 128, 129], the viability of the F<sub>1</sub> hybrids may be comparable or even higher than that of the parental species due to the heterosis and the absence of segregation. In contrast, the negative effects of hybridization on post-hatching viability usually result from segregation, and thus, they are confined to the F<sub>2</sub> generation, backcrosses, and higher order hybrids [21, 130]. In our experiment, the survival rate was high and fairly comparable among the *E. angramainyu*, *E. macularius*, F<sub>1</sub> hybrids and the pooled remaining categories of the hybrids. Nevertheless, all four hatchlings belonging to the F<sub>2</sub> generation showed deformations of the tail suggesting developmental problems during embryogenesis and only one of them survived up to the age of one year. Although the sample size of the F<sub>2</sub> generation was too small to allow for correct comparison of the survival rate, this record is noticeable.

The presence of TSD in the genus *Eublepharis* [125–127], which complicates the evolution of functionally differentiated sex chromosomes [131], may provide an alternative explanation of the geckos' ability to produce fertile between-species hybrids. In many animal taxa with genetic sex determination (GSD), fitness of the hybrids is strongly sex-biased. Following the

empirical Haldane's rule [132], hybrids of a heterogametic sex are regularly more affected by incompatibilities and consequent infertility. The genes responsible for the speciation (DMIs) tend to be recessive and localized on the non-homologous part of the X or Z chromosomes (the sex chromosomes present in a homogametic sex; [31, 133]). Thus, it may be expected that the absence of sex chromosomes retard the evolution of the postzygotic reproductive isolating mechanisms (RIMs). Nevertheless, the list of the reptilian taxa, in which the hybridization among distant species was reported, contains not only clades with the TSD (chelonians, crocodylians), but also many species with the GSD (e.g., iguanids [62–65] and colubrid snakes [75, 134, 135]; for evolution of sex determination mechanisms among squamates see [136]). Surprisingly, a recent review of hybridization events in lizards showed that reliable reports about hybridization of species with TSD are lacking [44]. In this context, the fact that the HKY distance of the mt cyt b gene sequences of the *E. angramainyu* and *E. macularius* (22%) is higher than those in all other pairs of hybridizing lizard species reported to date [44].

Published studies properly documenting experimental hybridization of distinct lizard species are extremely scarce [69, 70, 137–140], for review see [44]. There is, however, a study performed in a model system of European lizards with GSD exhibiting a degree of genetic differentiation [141], which is roughly comparable to the one occurring between the *E. macularius* and *E. angramainyu* possessing TSD. Rykena (1991, 1996, 2002) [67–69] performed experimental crossings among five species belonging to the genus *Lacerta* (*L. viridis*, *L. agilis*, *L. strigata*, *L. schreiberi*, and *L. trilineata*) with well-differentiated sex chromosomes (ZW). The author confirmed a sex bias predicted by the Haldane's rule, i.e., the hybrid infertility affected the heterogametic females, but not the homogametic males of between-species hybrids. The rate of female infertility proved by both breeding and dissection of the reproductive organs varied among pairs of the hybridized species. The attempts to produce F<sub>1</sub> hybrids and backcrosses (via fertile male hybrids) were repeatedly successful, while the F<sub>2</sub> hybrids were only rare. Thus, these thorough experiments demonstrated that a gene flow among the studied species of the genus *Lacerta* is not entirely precluded by postzygotic RIMs in spite of GSD. Consequently, to properly answer the question whether the TSD enhances the success of hybridization between distinct species, additional experimental data are required. Multiple pairs of either TSD or GSD species with similar divergence time need to be crossed and the efficiency of the recorded RIMs compared.

## Phenotype of the hybrids

Our morphological analyses confirmed a clear differentiation of the studied populations of the *E. macularius* and *E. angramainyu* in the body size and shape, as well as in the coloration pattern. The phenotype of the descendants of the *E. macularius* mothers sired by *E. angramainyu* (or F<sub>1</sub> hybrid) males contained clear paternal characters. This excludes the theoretical possibility of their parthenogenetic origin instead of hybridization. It is in accord with the absence of any record of parthenogenesis in the family Eublepharidae (for recent records of parthenogenesis in other reptiles, see [142–147]).

As expected, hybrid specimens tend to show intermediate characters, but a resemblance of the hybrid phenotype to the paternal and maternal ones varies among crossings and differs from a trait to a trait. The F<sub>1</sub> hybrids, descendants of an *E. macularius* female and an *E. angramainyu* male, resemble the *E. angramainyu* in their large adult body size, which strongly contrasts with a small body size of the hatchlings (which is close to that of their mothers). This may be interpreted either as dominance of the paternal alleles or as a result of enhanced growth enabled by the heterosis. In contrast, body shape of the F<sub>1</sub> hybrids was close to that of the *E. macularius* along the first canonical axis (CV1; short limbs), but showed a specific feature

(longer SVL and wider head) that differed from both the paternal species as well as the higher order hybrids on the CV2 axis (see Fig 6).

Similar unique characters of hybrids were demonstrated in other taxa like transgression segregation [18, 148–150]. These novelties may be preferred in some ecological conditions (e. g., suboptimal for parent species [22]). In some cases, the hybrids were reported to be possibly more competitive than the parent species (e.g., parthenogenetic species [151], but see [6, 22]). It is known that certain body constitution is optimal for a specific habitat (grassland, rocky land, sand dunes) and is also positively selected for different mobility. Long legs are better for sprint and jumping, short robust legs are favored for burrowing and rock climbing [152–154]. Due to the origin of the transgression characters or intermediate characters of hybrids, these specimens could occupy new ecological niches [155], gain new food sources [22], be better in some performance activities [148, 156], and then be more successful against predators or in male fights over territories and mating rights than one or both of the parental species. Nevertheless, relatively instantaneous combination of traits developed due to hybridization facilitates a rapid adaptive radiation [4, 157] and offers fresh evolutionary scenarios for re-examination in nature selection.

## Conclusions

We demonstrated that the *E. macularius* is able to hybridize with its congeneric species, the *E. angramainyu*. F<sub>1</sub> hybrids are viable and fertile, and introgression of the *E. angramainyu* genes into the *E. macularius* genome is enabled via backcrossing. The examined hybrids (except those of the F<sub>2</sub> generation) displayed neither malformations nor reduced survival. Analyses of morphometric and coloration traits confirmed phenotypic distinctness of both parental species and their F<sub>1</sub> hybrids.

These findings contrast with the scenario of a long-term geographic and evolutionary separation of these species, which is supported by both biogeographic and genetic arguments.

In conclusion, occurrence of fertile hybrids of distinct species, which are comparably divergent such as the *E. angramainyu* and *E. macularius*, may be also expected in other taxa of squamates. This would violate the current estimates of species diversity in lizards as well as warn against taxonomic decisions leading to excessive splitting of lizard species.

## Acknowledgments

We thank Milan Makovec (Brno) who kindly allowed us to take measurements of the *E. angramainyu* in his large breeding colony. We thank Pavel Munclinger and Lukáš Kratochvíl for discussions, Silvie Lišková for improvement of the English and the proofreading, Petra Frýdlová for critical reading and comments, Veronika Musilová, Pavlína Ševčíková and Petra Suchomelová for the care of the animals.

## Author Contributions

Conceived and designed the experiments: DF EL JLL. Performed the experiments: JLL DF. Analyzed the data: DF JLL. Contributed reagents/materials/analysis tools: DF EL. Wrote the paper: JLL DF EL.

## References

1. Darwin C. On the Origin of Species by means of Natural Selection, or the preservation of favoured races in the struggle for life. London: John Murray; 1859.

2. Arnold ML. Natural hybridization as an evolutionary process. *Annual Review of Ecology and Systematics*. 1992; 23:237–61. doi: [10.1146/annurev.es.23.110192.001321](https://doi.org/10.1146/annurev.es.23.110192.001321) PMID: [WOS:A1992JZ28100010](https://pubmed.ncbi.nlm.nih.gov/11992JZ28100010/).
3. Grant PR, Grant BR. Hybridization of bird species. *Science*. 1992; 256(5054):193–7. doi: [10.1126/science.256.5054.193](https://doi.org/10.1126/science.256.5054.193) PMID: [WOS:A1992HM89600021](https://pubmed.ncbi.nlm.nih.gov/WOS:A1992HM89600021/).
4. Dowling T, Secor C. The role of hybridization and introgression in the diversification of animals. *Annual Review of Ecology and Systematics*. 1997; 28:593–619. doi: [10.1146/annurev.ecolsys.28.1.593](https://doi.org/10.1146/annurev.ecolsys.28.1.593) PMID: [WOS:000070961400023](https://pubmed.ncbi.nlm.nih.gov/WOS:000070961400023/).
5. Barton NH. The role of hybridization in evolution. *Molecular Ecology*. 2001; 10(3):551–68. doi: [10.1046/j.1365-294x.2001.01216.x](https://doi.org/10.1046/j.1365-294x.2001.01216.x) PMID: [WOS:000168367400003](https://pubmed.ncbi.nlm.nih.gov/WOS:000168367400003/).
6. Burke J, Arnold M. Genetics and the fitness of hybrids. *Annual Review of Genetics*. 2001; 35:31–52. doi: [10.1146/annurev.genet.35.102401.085719](https://doi.org/10.1146/annurev.genet.35.102401.085719) PMID: [WOS:000172991500002](https://pubmed.ncbi.nlm.nih.gov/WOS:000172991500002/).
7. True J, Weir B, Laurie C. A genome-wide survey of hybrid incompatibility factors by the introgression of marked segments of *Drosophila mauritiana* chromosomes into *Drosophila simulans*. *Genetics*. 1996; 142(3):819–37. PMID: [WOS:A1996TX45500015](https://pubmed.ncbi.nlm.nih.gov/WOS:A1996TX45500015/).
8. Mallet J, Beltran M, Neukirchen W, Linares M. Natural hybridization in heliconiine butterflies: the species boundary as a continuum. *Bmc Evolutionary Biology*. 2007; 7. doi: [10.1186/1471-2148-7-28](https://doi.org/10.1186/1471-2148-7-28) PMID: [WOS:000244937000001](https://pubmed.ncbi.nlm.nih.gov/WOS:000244937000001/).
9. Miralles L, Machado-Schiaffino G, Garcia-Vazquez E. Genetic markers reveal a gradient of hybridization between cape hakes (*Merluccius capensis* and *Merluccius paradoxus*) in their sympatric geographic distribution. *Journal of Sea Research*. 2014; 86:69–75. doi: [10.1016/j.seares.2013.11.009](https://doi.org/10.1016/j.seares.2013.11.009) PMID: [WOS:000330501000008](https://pubmed.ncbi.nlm.nih.gov/WOS:000330501000008/).
10. Vines TH, Kohler SC, Thiel A, Ghira I, Sands TR, MacCallum CJ, et al. The maintenance of reproductive isolation in a mosaic hybrid zone between the fire-bellied toads *Bombina bombina* and *B. variegata*. *Evolution*. 2003; 57(8):1876–88. PMID: [WOS:000185073500016](https://pubmed.ncbi.nlm.nih.gov/WOS:000185073500016/).
11. Machado T, Silva VX, Silva MJD. Phylogenetic relationships within *Bothrops neuwiedi* group (Serpentes, Squamata): Geographically highly-structured lineages, evidence of introgressive hybridization and Neogene/Quaternary diversification. *Molecular Phylogenetics and Evolution*. 2014; 71:1–14. doi: [10.1016/j.ympev.2013.10.003](https://doi.org/10.1016/j.ympev.2013.10.003) PMID: [WOS:000330086000001](https://pubmed.ncbi.nlm.nih.gov/WOS:000330086000001/).
12. Olave M, Martinez LE, Avila LJ, Sites JW, Morando M. Evidence of hybridization in the Argentinean lizards *Liolaemus gracilis* and *Liolaemus bibronii* (IGUANIA: LIOLAEMINI): An integrative approach based on genes and morphology. *Molecular Phylogenetics and Evolution*. 2011; 61(2):381–91. doi: [10.1016/j.ympev.2011.07.006](https://doi.org/10.1016/j.ympev.2011.07.006) PMID: [WOS:000295440600012](https://pubmed.ncbi.nlm.nih.gov/WOS:000295440600012/).
13. Grant PR, Grant BR, Markert JA, Keller LF, Petren K. Convergent evolution of Darwin's finches caused by introgressive hybridization and selection. *Evolution*. 2004; 58(7):1588–99. PMID: [WOS:000222982800017](https://pubmed.ncbi.nlm.nih.gov/WOS:000222982800017/).
14. Reifova R, Kverek P, Reif J. The first record of a female hybrid between the Common Nightingale (*Luscinia megarhynchos*) and the Thrush Nightingale (*Luscinia luscinia*) in nature. *Journal of Ornithology*. 2011; 152(4):1063–8. doi: [10.1007/s10336-011-0700-7](https://doi.org/10.1007/s10336-011-0700-7) PMID: [WOS:000296073300025](https://pubmed.ncbi.nlm.nih.gov/WOS:000296073300025/).
15. Macholan M, Munclinger P, Sugerikova M, Dufkova P, Bimova B, Bozikova E, et al. Genetic analysis of autosomal and X-linked markers across a mouse hybrid zone. *Evolution*. 2007; 61(4):746–71. doi: [10.1111/j.1558-5646.2007.00065.x](https://doi.org/10.1111/j.1558-5646.2007.00065.x) PMID: [WOS:000245819500003](https://pubmed.ncbi.nlm.nih.gov/WOS:000245819500003/).
16. Amaral AR, Lovewell G, Coelho MM, Amato G, Rosenbaum HC. Hybrid speciation in a marine mammal: The Clymene Dolphin (*Stenella clymene*). *Plos One*. 2014; 9(1). doi: [10.1371/journal.pone.0083645](https://doi.org/10.1371/journal.pone.0083645) PMID: [WOS:000329862500062](https://pubmed.ncbi.nlm.nih.gov/WOS:000329862500062/).
17. Rieseberg LH, Archer MA, Wayne RK. Transgressive segregation, adaptation and speciation. *Heredity*. 1999; 83:363–72. doi: [10.1038/sj.hdy.6886170](https://doi.org/10.1038/sj.hdy.6886170) PMID: [WOS:000083567300001](https://pubmed.ncbi.nlm.nih.gov/WOS:000083567300001/).
18. Stelkens R, Seehausen O. Genetic distance between species predicts novel trait expression in their hybrids. *Evolution*. 2009; 63(4):884–97. doi: [10.1111/j.1558-5646.2008.00599.x](https://doi.org/10.1111/j.1558-5646.2008.00599.x) PMID: [WOS:000264379200007](https://pubmed.ncbi.nlm.nih.gov/WOS:000264379200007/).
19. Hedrick PW. Adaptive introgression in animals: examples and comparison to new mutation and standing variation as sources of adaptive variation. *Molecular Ecology*. 2013; 22(18):4606–18. doi: [10.1111/mec.12415](https://doi.org/10.1111/mec.12415) PMID: [WOS:000324022600002](https://pubmed.ncbi.nlm.nih.gov/WOS:000324022600002/).
20. Lynch M. The genetic interpretation of inbreeding depression and outbreeding depression. *Evolution*. 1991; 45(3):622–9. doi: [10.2307/2409915](https://doi.org/10.2307/2409915) PMID: [WOS:A1991FQ98400009](https://pubmed.ncbi.nlm.nih.gov/WOS:A1991FQ98400009/).
21. Edmands S. Heterosis and outbreeding depression in interpopulation crosses spanning a wide range of divergence. *Evolution*. 1999; 53(6):1757–68. doi: [10.2307/2640438](https://doi.org/10.2307/2640438) PMID: [WOS:000084703100011](https://pubmed.ncbi.nlm.nih.gov/WOS:000084703100011/).

22. Grant BR, Grant PR. High survival of Darwin's finch hybrids: Effects of beak morphology and diets. *Ecology*. 1996; 77(2):500–9. doi: [10.2307/2265625](https://doi.org/10.2307/2265625) PMID: [WOS:A1996TY19800013](https://pubmed.ncbi.nlm.nih.gov/19800013/).
23. Lopez-Fernandez H, Bolnick DI. What Causes Partial F1 Hybrid Viability? Incomplete Penetrance versus Genetic Variation. *Plos One*. 2007; 2(12). doi: [10.1371/journal.pone.0001294](https://doi.org/10.1371/journal.pone.0001294) PMID: [WOS:000207459500013](https://pubmed.ncbi.nlm.nih.gov/13131313/).
24. Baranwal VK, Mikkilineni V, Zehr UB, Tyagi AK, Kapoor S. Heterosis: emerging ideas about hybrid vigour. *Journal of Experimental Botany*. 2012; 63(18):6309–14. doi: [10.1093/jxb/ers291](https://doi.org/10.1093/jxb/ers291) PMID: [WOS:000311645700001](https://pubmed.ncbi.nlm.nih.gov/22400001/).
25. Grant BR, Grant PR. Fission and fusion of Darwin's finches populations. *Philosophical Transactions of the Royal Society B-Biological Sciences*. 2008; 363(1505):2821–9. doi: [10.1098/rstb.2008.0051](https://doi.org/10.1098/rstb.2008.0051) PMID: [WOS:000258026400003](https://pubmed.ncbi.nlm.nih.gov/18400003/).
26. Edmands S. Between a rock and a hard place: evaluating the relative risks of inbreeding and outbreeding for conservation and management. *Molecular Ecology*. 2007; 16(3):463–75. doi: [10.1111/j.1365-294X.2006.03148.x](https://doi.org/10.1111/j.1365-294X.2006.03148.x) PMID: [WOS:000243755800001](https://pubmed.ncbi.nlm.nih.gov/16400001/).
27. Dobzhansky T. Studies on hybrid sterility. II. localization of sterility factors in *Drosophila pseudoobscura* hybrids. *Genetics*. 1936; 21:113–35. PMID: [17246786](https://pubmed.ncbi.nlm.nih.gov/17246786/)
28. Dobzhansky T. *Genetics and the Origin of the Species*. [S.I.]: Columbia University Press; 1937.
29. Muller H. Bearing of the *Drosophilla* work on systematics. In: Huxley J, editor. *The New Systematics*. Oxford: Clarendon Press; 1940. p. 185–268.
30. Muller HJ. Isolating mechanisms, evolution and temperature. *Biol Symp*. 1942; 6(811):71–125.
31. Presgraves DC. Darwin and the Origin of Interspecific Genetic Incompatibilities. *American Naturalist*. 2010; 176:S45–S60. doi: [10.1086/657058](https://doi.org/10.1086/657058) PMID: [WOS:000283740200004](https://pubmed.ncbi.nlm.nih.gov/2000004/).
32. Sasa M, Chippindale P, Johnson N. Patterns of postzygotic isolation in frogs. *Evolution*. 1998; 52(6):1811–20. doi: [10.2307/2411351](https://doi.org/10.2307/2411351) PMID: [WOS:000078076700024](https://pubmed.ncbi.nlm.nih.gov/16400024/).
33. Lijtmaer D, Mahler B, Tubaro P. Hybridization and postzygotic isolation patterns in pigeons and doves. *Evolution*. 2003; 57(6):1411–8. PMID: [WOS:000183997400018](https://pubmed.ncbi.nlm.nih.gov/183997400018/).
34. Bolnick DI, Near TJ. Tempo of hybrid inviability in centrarchid fishes (Teleostei: Centrarchidae). *Evolution*. 2005; 59(8):1754–67. PMID: [WOS:000231658900013](https://pubmed.ncbi.nlm.nih.gov/231658900013/).
35. Orr HA, Coyne JA. The genetics of postzygotic isolation in the *Drosophila virilis* group. *Genetics*. 1989; 121(3):527–37. PMID: [WOS:A1989T507100012](https://pubmed.ncbi.nlm.nih.gov/1989T507100012/).
36. Matute DR, Butler IA, Turissini DA, Coyne JA. A Test of the Snowball Theory for the Rate of Evolution of Hybrid Incompatibilities. *Science*. 2010; 329(5998):1518–21. doi: [10.1126/science.1193440](https://doi.org/10.1126/science.1193440) PMID: [WOS:000281869000040](https://pubmed.ncbi.nlm.nih.gov/281869000040/).
37. Arrieta RS, Lijtmaer DA, Tubaro PL. Evolution of postzygotic reproductive isolation in galliform birds: analysis of first and second hybrid generations and backcrosses. *Biological Journal of the Linnean Society*. 2013; 110(3):528–42. doi: [10.1111/bij.12153](https://doi.org/10.1111/bij.12153) PMID: [WOS:000325979900004](https://pubmed.ncbi.nlm.nih.gov/259799000004/).
38. Arntzen JW, Wielstra B, Wallis GP. The modality of nine *Triturus* new hybrid zones assessed with nuclear, mitochondrial and morphological data. *Biological Journal of the Linnean Society*. 2014; 113(2):604–22. doi: [10.1111/bij.12358](https://doi.org/10.1111/bij.12358) PMID: [WOS:000342613900022](https://pubmed.ncbi.nlm.nih.gov/342613900022/).
39. Schumer M, Cui RF, Powell D, Dresner R, Rosenthal G, Andolfatto P. High-resolution mapping reveals hundreds of genetic incompatibilities in hybridizing fish species. *Elife*. 2014; 3. doi: [10.7554/eLife.02535](https://doi.org/10.7554/eLife.02535) PMID: [WOS:000336837300003](https://pubmed.ncbi.nlm.nih.gov/336837300003/).
40. Herrington SJ, Hettiger KN, Heist EJ, Keeney DB. Hybridization between longnose and alligator gars in captivity, with comments on possible gar hybridization in nature. *Transactions of the American Fisheries Society*. 2008; 137(1):158–64. doi: [10.1577/t07-044.1](https://doi.org/10.1577/t07-044.1) PMID: [WOS:000254039600013](https://pubmed.ncbi.nlm.nih.gov/254039600013/).
41. Hedges SB, Dudley J, Kumar S. TimeTree: a public knowledge-base of divergence times among organisms. *Bioinformatics*. 2006; 22(23):2971–2. doi: [10.1093/bioinformatics/btl505](https://doi.org/10.1093/bioinformatics/btl505) PMID: [WOS:000242246300027](https://pubmed.ncbi.nlm.nih.gov/242246300027/).
42. Karl SA, Bowen BW, Avise JC. Hybridization among the ancient marineres: Characterization of marine turtle hybrids with molecular genetic assays. *Journal of Heredity*. 1995; 86(4):262–8. PMID: [WOS:A1995RN20100002](https://pubmed.ncbi.nlm.nih.gov/1995RN20100002/).
43. Smith SA, Stephens PR, Wiens JJ. Replicate patterns of species richness, historical biogeography, and phylogeny in holarctic treefrogs. *Evolution*. 2005; 59(11):2433–50. PMID: [WOS:000233769000015](https://pubmed.ncbi.nlm.nih.gov/233769000015/).
44. Jancuchova-Laskova J, Landova E, Frynta D. Are genetically distinct lizard species able to hybridize? A review. *Current Zoology*. 2015; 61(1):155–80. PMID: [WOS:000349003500016](https://pubmed.ncbi.nlm.nih.gov/349003500016/).

45. Wilson AC, Maxson LR, Sarich VM. Two types of molecular evolution. Evidence from studies of inter-specific hybridization. *Proceedings of the National Academy of Sciences of the United States of America*. 1974; 71(7):2843–7. doi: [10.1073/pnas.71.7.2843](https://doi.org/10.1073/pnas.71.7.2843) PMID: [WOS:A1974T934000058](https://pubmed.ncbi.nlm.nih.gov/1019747934000058/).
46. Prager E, Wilson A. Slow evolutionary loss of the potential for interspecific hybridization in birds: A manifestation of slow regulatory evolution. *Proceedings of the National Academy of Sciences of the United States of America*. 1975; 72(1):200–4. doi: [10.1073/pnas.72.1.200](https://doi.org/10.1073/pnas.72.1.200) PMID: [WOS:A1975V479600044](https://pubmed.ncbi.nlm.nih.gov/101975V479600044/).
47. Fitzpatrick BM. Rates of evolution of hybrid inviability in birds and mammals. *Evolution*. 2004; 58(8):1865–70. PMID: [WOS:000223583900022](https://pubmed.ncbi.nlm.nih.gov/1000223583900022/).
48. Naro-Maciel E, Le M, FitzSimmons NN, Amato G. Evolutionary relationships of marine turtles: A molecular phylogeny based on nuclear and mitochondrial genes. *Molecular Phylogenetics and Evolution*. 2008; 49(2):659–62. doi: [10.1016/j.ympev.2008.08.004](https://doi.org/10.1016/j.ympev.2008.08.004) PMID: [WOS:000261034400024](https://pubmed.ncbi.nlm.nih.gov/1000261034400024/).
49. Schilde M, Barth D, Fritz U. An *Ocadia sinensis* x *Cyclemys shanensis* hybrid (Testudines: Geoemydidae). *Asiatic Herpetological Research*. 2004; 10:120–5.
50. Buskirk JR, Parham JF, Feldman CR. On the hybridisation between two distance related Asian turtles (Testudines: *Sacalia* x *Mauremys*). *Salamandra*. 2005; 41(1/2):21–6.
51. Georges A, Adams M, McCord W. Electrophoretic delineation of species boundaries within the genus *Chelodina* (Testudines: Chelidae) of Australia, New Guinea and Indonesia. *Zoological Journal of the Linnean Society*. 2002; 134(4):401–21. doi: [10.1046/j.1096-3642.2002.00007.x](https://doi.org/10.1046/j.1096-3642.2002.00007.x) PMID: [WOS:000175582200002](https://pubmed.ncbi.nlm.nih.gov/1000175582200002/).
52. Lourenco JM, Glemin S, Chiari Y, Galtier N. The determinants of the molecular substitution process in turtles. *Journal of Evolutionary Biology*. 2013; 26(1):38–50. doi: [10.1111/jeb.12031](https://doi.org/10.1111/jeb.12031) PMID: [WOS:000312543700004](https://pubmed.ncbi.nlm.nih.gov/1000312543700004/).
53. Polet G, Murphy DJ, Phan VL, Tran VM. Crocodile conservation at work in Vietnam, re-establishing *Crocodylus siamensis* in Cat Tien National Park. *Proceedings of the 16th Working Meeting of the IUCN-SSC Crocodile Specialist Group Gainesville, Florida, 7–10 October 2002*. 2002:86–95.
54. Brochu CA. Phylogenetic relationships and divergence timing of *Crocodylus* based on morphology and the fossil record. *Copeia*. 2000;(3):657–73. PMID: [WOS:000165053800002](https://pubmed.ncbi.nlm.nih.gov/1000165053800002/).
55. Darevsky IS, Kupriyanova LA. Two new all-female lizard species of the genus *Leiolepis* Cuvier, 1829 from Thailand and Vietnam (Squamata: Sauria: Uromastycinae). *Herpetozoa*. 1993; 6(1–2):3–20. PMID: [ZOR13000014780](https://pubmed.ncbi.nlm.nih.gov/100013000014780/).
56. Uzzell T, Darevsky IS. Biochemical evidence for hybrid origin of parthenogenetic species of *Lacerta saxicola* complex (Sauria: Lacertidae), with a discussion of some ecological and evolutionary implications. *Copeia*. 1975;(2):204–22. PMID: [WOS:A1975AD69300002](https://pubmed.ncbi.nlm.nih.gov/10001975AD69300002/).
57. Wright JW, Lowe CH. Weeds polyploids parthenogenesis and geographical and ecological distribution of all-female species of *Cnemidophorus*. *Copeia*. 1968;(1):128–38. PMID: [WOS:A1968A844600013](https://pubmed.ncbi.nlm.nih.gov/10001968A844600013/).
58. Cuellar O, Kluge AG. Natural parthenogenesis in gekkonid lizard *Lepidodactylus lugubris*. *Journal of Genetics*. 1972; 61(1):14–26. doi: [10.1007/bf02984098](https://doi.org/10.1007/bf02984098) PMID: [WOS:A1972P331400002](https://pubmed.ncbi.nlm.nih.gov/10001972P331400002/).
59. Darevsky IS, Kupriyanova LA, Roshchin VV. A New All-Female Triploid Species of Gecko and Karyological Data on the Bisexual *Hemidactylus frenatus* from Vietnam. *Journal of Herpetology*. 1984; 18(3):277–84. doi: [10.2307/1564081](https://doi.org/10.2307/1564081) PMID: [WOS:A1984TH26300007](https://pubmed.ncbi.nlm.nih.gov/10001984TH26300007/).
60. Moritz C. Parthenogenesis in the endemic Australian lizard *Heteronotia binoei* (Gekkonidae). *Science*. 1983; 220(4598):735–7. doi: [10.1126/science.220.4598.735](https://doi.org/10.1126/science.220.4598.735) PMID: [WOS:A1983QN77100037](https://pubmed.ncbi.nlm.nih.gov/10001983QN77100037/).
61. Moritz C. Parthenogenesis in the tropical gekkonid lizard, *Nactus arnouxii* (Sauria, Gekkonidae). *Evolution*. 1987; 41(6):1252–66. doi: [10.2307/2409091](https://doi.org/10.2307/2409091) PMID: [WOS:A1987L209500008](https://pubmed.ncbi.nlm.nih.gov/10001987L209500008/).
62. Rassmann K, Trillmich F, Tautz D. Hybridization between the Galapagos land and marine iguana (*Conolophus subcristatus* and *Amblyrhynchus cristatus*) on Plaza Sur. *Journal of Zoology*. 1997; 242:729–39. PMID: [WOS:A1997XR08300007](https://pubmed.ncbi.nlm.nih.gov/10001997XR08300007/).
63. Lücker H, Feiler A. Beobachtungen einer Paarung zwischen Meerechsen-Männchen (*Amblyrhynchus cristatus*) und Landleguan-Weibchen (*Conolophus subcristatus*) auf Plaza-Sur/Galapagos-Inseln sowie Beobachtungen an einem adulten Gattungshybriden (*Amblyrhynchus* x *Conolophus*). *Elaphe*. 2002; 10:49–54.
64. Gutsche A, Köhler G. A fertile hybrid between *Ctenosaura similis* (Gray, 1831) and *C. bakeri* Stejneger, 1901 (Squamata: Iguanidae) on Isla de Utila, Honduras. *Salamandra*. 2004; 40(3/4):201–6.
65. Breuil M. Taxon report: Lesser Antilles *Iguana delicatissima* and *Iguana iguana*. *West Indian Iguana Specialist Group Newsletter*. 2000; 3(2):11–5.
66. Rykena S, Henke L. Bastardierung von *Lacerta viridis* und *Lacerta agilis* im Terrarium (Reptilia: Sauria:Lacertidae). *Salamandra*. 1978; 14(3):147–52.

67. Rykena S. Kreuzungsexperimente zur Prüfung der Artgrenzen im Genus *Lacerta* sensu stricto. Mitt Zool Mus Berlin. 1991; 67(1):55–68.
68. Rykena S. Experimental interspecific hybridization in the genus *Lacerta*. Israel Journal of Zoology. 1996; 42(2):171–84. PMID: [WOS:A1996VC47300008](#).
69. Rykena S. Experimental hybridization in Green Lizards (*Lacerta* s.str.), a tool to study species boundaries. Mertensiella. 2002; 13:78–88.
70. Peek R. Morfologische en gedragsafwijkingen in een kruising tussen de Westelijke smaragdhagedis (*Lacerta bilineata*) en de Reuzensmaragdhagedis (*Lacerta trilineata*). Lacerta. 2009; 67(6):251–4.
71. Capula M. Natural hybridization in *Podarcis sicula* and *P. wagleriana* (Reptilia: Lacertidae). Biochemical Systematics and Ecology. 1993; 21(3):373–80. doi: [10.1016/0305-1978\(93\)90028-P](#) PMID: [WOS:A1993KY38300007](#).
72. Capula M. Genetic evidence of natural hybridization between *Podarcis sicula* and *Podarcis tiliguerta* (Reptilia: Lacertidae). Amphibia-Reptilia. 2002; 23(3):313–21. doi: [10.1163/15685380260449199](#) PMID: [WOS:000179247800007](#).
73. Hoser R. Problems of python classification and hybrid pythons. Litteratura Serpenti. 1988; 8(3):134–9.
74. Branch B, Erasmus H. Captive breeding of pythons in south Africa, including details of an interspecific hybrid (*Python sebae natalensis* x *Python molurus bivittatus*). Journal of the Herpetological Association of Africa. 1984; 30:1–10.
75. LeClere JB, Hoaglund EP, Scharosch J, Smith CE, Gamble T. Two Naturally Occurring Intergeneric Hybrid Snakes (*Pituophis catenifer sayi* x *Pantherophis vulpinus*; Lampropeltini, Squamata) from the Midwestern United States. Journal of Herpetology. 2012; 46(2):257–62. doi: [10.1670/10-260](#) PMID: [WOS:000306046300019](#).
76. Zinenko O. First generation hybrids between the Nikolsky's adder, *Vipera nikolskii*, and the common adder, *Vipera berus* (Reptilia, Serpentes, Viperidae). Vestnik Zoologii. 2003; 37(1):101–4.
77. Zinenko O. New data about hybridization between *Vipera nikolskii* VEDMEDERYA, GRUBANT & RUDAEVA, 1986 and *Vipera berus berus* (LINNAEUS, 1758) and their contact zones in Ukraine. Mertensiella. 2004; 15:17–28.
78. Frankham R. Conservation genetics. Annual Review of Genetics. 1995; 29:305–27. doi: [10.1146/annurev.ge.29.120195.001513](#) PMID: [WOS:A1995TL71900012](#).
79. Frankham R, Ballou JD, Eldridge MDB, Lacy RC, Ralls K, Dudash MR, et al. Predicting the Probability of Outbreeding Depression. Conservation Biology. 2011; 25(3):465–75. doi: [10.1111/j.1523-1739.2011.01662.x](#) PMID: [WOS:000290491700009](#).
80. Lande R. Genetics and demography in biological conservation. Science. 1988; 241(4872):1455–60. doi: [10.1126/science.3420403](#) PMID: [WOS:A1988Q047900028](#).
81. Dobson AP, Lovejoy TE. Conservation and biodiversity: Scientific American Library Freeman^ eNew York New York; 1996.
82. Frankham R, Ballou JD, Dudash MR, Eldridge MDB, Fenster CB, Lacy RC, et al. Implications of different species concepts for conserving biodiversity. Biological Conservation. 2012; 153:25–31. doi: [10.1016/j.biocon.2012.04.034](#) PMID: [WOS:000307917800004](#).
83. Anderson SC. The lizards of Iran: Society for the Study of Amphibians and Reptiles.[c/o] Cornell University, Department of Neurobiology and Behavior; 1999.
84. Mouthereau F. Timing of uplift in the Zagros belt/Iranian plateau and accommodation of late Cenozoic Arabia-Eurasia convergence. Geological Magazine. 2011; 148(5–6):726–38. doi: [10.1017/s0016756811000306](#) PMID: [WOS:000294759700004](#).
85. Mouthereau F, Lacombe O, Verges J. Building the Zagros collisional orogen: Timing, strain distribution and the dynamics of Arabia/Eurasia plate convergence. Tectonophysics. 2012; 532:27–60. doi: [10.1016/j.tecto.2012.01.022](#) PMID: [WOS:000303308300002](#).
86. Smit JHW, Cloetingh S, Burov E, Tesauro M, Sokoutis D, Kaban M. Interference of lithospheric folding in western Central Asia by simultaneous Indian and Arabian plate indentation. Tectonophysics. 2013; 602:176–93. doi: [10.1016/j.tecto.2012.10.032](#) PMID: [WOS:000323855300012](#).
87. Macey JR, Schulte JA, Ananjeva NB, Larson A, Rastegar-Pouyani N, Shammakov SM, et al. Phylogenetic relationships among agamid lizards of the *Laudakia caucasia* species group: Testing hypotheses of biogeographic fragmentation and an area cladogram for the Iranian Plateau. Molecular Phylogenetics and Evolution. 1998; 10(1):118–31. doi: [10.1006/mpev.1997.0478](#) PMID: [WOS:000075912900010](#).
88. Macey J, Schulte J, Kami H, Ananjeva N, Larson A, Papenfuss T. Testing hypotheses of vicariance in the agamid lizard *Laudakia caucasia* from mountain ranges on the Northern Iranian Plateau. Molecular

- Phylogenetics and Evolution. 2000; 14(3):479–83. doi: [10.1006/mpev.1999.0722](https://doi.org/10.1006/mpev.1999.0722) PMID: [WOS:000086029300015](https://pubmed.ncbi.nlm.nih.gov/100086029300015/).
89. Pouyani ER, Pouyani NR, Noreini SK, Joger U, Wink M. Molecular phylogeny of the *Eremias persica* complex of the Iranian plateau (Reptilia: Lacertidae), based on mtDNA sequences. *Zoological Journal of the Linnean Society*. 2010; 158(3):641–60. doi: [10.1111/j.1096-3642.2009.00553.x](https://doi.org/10.1111/j.1096-3642.2009.00553.x) PMID: [WOS:000274951000008](https://pubmed.ncbi.nlm.nih.gov/200274951000008/).
  90. Smid J, Frynta D. Genetic variability of *Mesalina watsonana* (Reptilia: Lacertidae) on the Iranian plateau and its phylogenetic and biogeographic affinities as inferred from mtDNA sequences. *Acta Herpetologica*. 2012; 7(1):139–53. PMID: [WOS:000307867300015](https://pubmed.ncbi.nlm.nih.gov/2000307867300015/).
  91. Flores D, Tousignant A, Crews D. Incubation temperature affects the behavior of adult leopard geckos (*Eublepharis macularius*). *Physiology & Behavior*. 1994; 55(6):1067–72. doi: [10.1016/0031-9384\(94\)90389-1](https://doi.org/10.1016/0031-9384(94)90389-1) PMID: [WOS:A1994NL11700013](https://pubmed.ncbi.nlm.nih.gov/1000000013/).
  92. Huang V, Crews D. Differences induced by incubation temperature, versus androgen manipulation, in male leopard geckos (*Eublepharis macularius*). *Physiology & Behavior*. 2012; 107(1):121–4. doi: [10.1016/j.physbeh.2012.06.014](https://doi.org/10.1016/j.physbeh.2012.06.014) PMID: [WOS:000308450000018](https://pubmed.ncbi.nlm.nih.gov/200030845000018/).
  93. Rhen T, Sakata J, Zeller M, Crews D. Sex steroid levels across the reproductive cycle of female leopard geckos, *Eublepharis macularius*, from different incubation temperatures. *General and Comparative Endocrinology*. 2000; 118(2):322–31. doi: [10.1006/gcen.2000.7477](https://doi.org/10.1006/gcen.2000.7477) PMID: [WOS:000087397600011](https://pubmed.ncbi.nlm.nih.gov/2000087397600011/).
  94. Starostova Z, Kubicka L, Konarzewski M, Kozłowski J, Kratochvil L. Cell Size but Not Genome Size Affects Scaling of Metabolic Rate in Eyelid Geckos. *American Naturalist*. 2009; 174(3):E100–E5. doi: [10.1086/603610](https://doi.org/10.1086/603610) PMID: [WOS:000268653400004](https://pubmed.ncbi.nlm.nih.gov/2000268653400004/).
  95. Starostova Z, Konarzewski M, Kozłowski J, Kratochvil L. Ontogeny of Metabolic Rate and Red Blood Cell Size in Eyelid Geckos: Species Follow Different Paths. *Plos One*. 2013; 8(5):8. doi: [10.1371/journal.pone.0064715](https://doi.org/10.1371/journal.pone.0064715) PMID: [WOS:000319330200157](https://pubmed.ncbi.nlm.nih.gov/2000319330200157/).
  96. LaDage L, Ferkin M. Male leopard geckos (*Eublepharis macularius*) can discriminate between two familiar females. *Behaviour*. 2006; 143:1033–49. doi: [10.1163/156853906778623644](https://doi.org/10.1163/156853906778623644) PMID: [WOS:000242085500006](https://pubmed.ncbi.nlm.nih.gov/2000242085500006/).
  97. Landova E, Jancuchova-Laskova J, Musilova V, Kadochova S, Frynta D. Ontogenetic switch between alternative antipredatory strategies in the leopard gecko (*Eublepharis macularius*): defensive threat versus escape. *Behavioral Ecology and Sociobiology*. 2013; 67(7):1113–22. doi: [10.1007/s00265-013-1536-3](https://doi.org/10.1007/s00265-013-1536-3) PMID: [WOS:000320024200008](https://pubmed.ncbi.nlm.nih.gov/2000320024200008/).
  98. Kratochvil L, Frynta D. Body size, male combat and the evolution of sexual dimorphism in eublepharid geckos (Squamata: Eublepharidae). *Biological Journal of the Linnean Society*. 2002; 76(2):303–14. doi: [10.1111/j.1095-8312.2002.tb02089.x](https://doi.org/10.1111/j.1095-8312.2002.tb02089.x) PMID: [WOS:000176149200009](https://pubmed.ncbi.nlm.nih.gov/2000176149200009/).
  99. Kratochvil L, Frynta D. Body-size effect on egg size in eublepharid geckos (Squamata: Eublepharidae), lizards with invariant clutch size: negative allometry for egg size in ectotherms is not universal. *Biological Journal of the Linnean Society*. 2006; 88(4):527–32. doi: [10.1111/j.1095-8312.2006.00627.x](https://doi.org/10.1111/j.1095-8312.2006.00627.x) PMID: [WOS:000239111800002](https://pubmed.ncbi.nlm.nih.gov/2000239111800002/).
  100. Seufer H, Kaverkin Y, Kirschner A, Boone J, Ernst T, Holfert T. *The Eyelash Geckos: Care, Breeding and Natural History*: Kirschner & Seufer Verlag; 2005.
  101. Turelli M, Orr HA. Dominance, epistasis and the genetics of postzygotic isolation. *Genetics*. 2000; 154(4):1663–79. PMID: [WOS:000086491000021](https://pubmed.ncbi.nlm.nih.gov/2000086491000021/).
  102. Frynta D, Moravec J, Cihakova J, Sadlo J, Hodkova Z, Kaftan M, et al. Results of the Czech Biological Expedition to Iran. Part 1. Notes on the distribution of amphibians and reptiles. *Acta Societatis Zoologicae Bohemicae*. 1997; 61(1):3–17. PMID: [ZOO13500008556](https://pubmed.ncbi.nlm.nih.gov/200013500008556/).
  103. Autumn K, Denardo DF. Behavioral thermoregulation increases growth-rate in a nocturnal lizard. *Journal of Herpetology*. 1995; 29(2):157–62. doi: [10.2307/1564552](https://doi.org/10.2307/1564552) PMID: [WOS:A1995TA49000001](https://pubmed.ncbi.nlm.nih.gov/2000000001/).
  104. Bull J, Gutzke W, Bulmer M. Nest choice in a captive lizard with temperature-dependent sex determination. *Journal of Evolutionary Biology*. 1988; 1(2):177–84. doi: [10.1046/j.1420-9101.1988.1020177.x](https://doi.org/10.1046/j.1420-9101.1988.1020177.x) PMID: [WOS:A1988P869600006](https://pubmed.ncbi.nlm.nih.gov/2000000006/).
  105. Bragg W, Fawcett J, Bragg T, Viets B. Nest-site selection in two eublepharid gecko species with temperature-dependent sex determination and one with genotypic sex determination. *Biological Journal of the Linnean Society*. 2000; 69(3):319–32. doi: [10.1111/j.1095-8312.2000.tb01208.x](https://doi.org/10.1111/j.1095-8312.2000.tb01208.x) PMID: [WOS:000086307500002](https://pubmed.ncbi.nlm.nih.gov/2000086307500002/).
  106. Viets BE, Tousignant A, Ewert MA, Nelson CE, Crews D. Temperature-dependent sex determination in the leopard gecko, *Eublepharis macularius*. *Journal of Experimental Zoology*. 1993; 265(6):679–83. doi: [10.1002/jez.1402650610](https://doi.org/10.1002/jez.1402650610) PMID: [WOS:A1993KY04200009](https://pubmed.ncbi.nlm.nih.gov/2000000009/).



107. Kratochvil L, Fokt M, Rehak I, Frynta D. Misinterpretation of character scaling: a tale of sexual dimorphism in body shape of common lizards. *Canadian Journal of Zoology-Revue Canadienne De Zoologie*. 2003; 81(6):1112–7. doi: [10.1139/z03-078](https://doi.org/10.1139/z03-078) PMID: [WOS:000184714500019](https://pubmed.ncbi.nlm.nih.gov/14500019/).
108. Frydlova P, Velensky P, Simkova O, Cikanova V, Hnizdo J, Rehak I, et al. Is body shape of mangrove-dwelling monitor lizards (*Varanus indicus*; Varanidae) sexually dimorphic? *Amphibia-Reptilia*. 2011; 32(1):27–37. doi: [10.1163/017353710X532184](https://doi.org/10.1163/017353710X532184) PMID: [WOS:000285828800003](https://pubmed.ncbi.nlm.nih.gov/28800003/).
109. Somers KM. Multivariate Allometry and Removal of Size with Principal Components Analysis. *Systematic Zoology*. 1986; 35(3):359–68. doi: [10.2307/2413387](https://doi.org/10.2307/2413387) PMID: [WOS:A1986E832900007](https://pubmed.ncbi.nlm.nih.gov/1986E832900007/).
110. Somers K. Allometry, Isometry and Shape in Principal Components Analysis. *Systematic Zoology*. 1989; 38(2):169–73. doi: [10.2307/2992386](https://doi.org/10.2307/2992386) PMID: [WOS:A1989AH27200008](https://pubmed.ncbi.nlm.nih.gov/A1989AH27200008/).
111. Thompson GG, Withers PC. Shape of Western Australian dragon lizards (Agamidae). *Amphibia-Reptilia*. 2005; 26(1):73–85. doi: [10.1163/1568538053693369](https://doi.org/10.1163/1568538053693369) PMID: [WOS:000228599600011](https://pubmed.ncbi.nlm.nih.gov/28599600011/).
112. Thompson GG, Withers PC. Size-free shape differences between male and female Western Australian dragon lizards (Agamidae). *Amphibia-Reptilia*. 2005; 26(1):55–63. doi: [10.1163/1568538053693332](https://doi.org/10.1163/1568538053693332) PMID: [WOS:000228599600009](https://pubmed.ncbi.nlm.nih.gov/28599600009/).
113. Thompson GG, Withers PC. The relationship between size-free body shape and choice of retreat for Western Australian *Ctenophorus* (Agamidae) dragon lizards. *Amphibia-Reptilia*. 2005; 26(1):65–72. doi: [10.1163/1568538053693323](https://doi.org/10.1163/1568538053693323) PMID: [WOS:000228599600010](https://pubmed.ncbi.nlm.nih.gov/28599600010/).
114. Glover KA, Kanda N, Haug T, Pastene LA, Oien N, Seliussen BB, et al. Hybrids between common and Antarctic minke whales are fertile and can back-cross. *Bmc Genetics*. 2013; 14. doi: [10.1186/1471-2156-14-25](https://doi.org/10.1186/1471-2156-14-25) PMID: [WOS:000318599400001](https://pubmed.ncbi.nlm.nih.gov/24000001/).
115. Zhang PJ, Han JB, Lu ZC, Chen RJ. Molecular Evidence of a Captive-Born Intergeneric Hybridization Between Bottlenose and Risso's Dolphins: *Tursiops truncatus* x *Grampus griseus*. *Aquatic Mammals*. 2014; 40(1):5–8. doi: [10.1578/am.40.1.2014.5](https://doi.org/10.1578/am.40.1.2014.5) PMID: [WOS:000332007500005](https://pubmed.ncbi.nlm.nih.gov/2500005/).
116. Price T, Bouvier M. The evolution of F1 postzygotic incompatibilities in birds. *Evolution*. 2002; 56(10):2083–9. PMID: [WOS:000179241700019](https://pubmed.ncbi.nlm.nih.gov/179241700019/).
117. Turelli M, Moyle LC. Asymmetric postmating isolation: Darwin's corollary to Haldane's rule. *Genetics*. 2007; 176(2):1059–88. doi: [10.1534/genetics.106.065979](https://doi.org/10.1534/genetics.106.065979) PMID: [WOS:000247870700029](https://pubmed.ncbi.nlm.nih.gov/247870700029/).
118. Bolnick DI, Turelli M, Lopez-Fernandez H, Wainwright PC, Near TJ. Accelerated mitochondrial evolution and "Darwin's corollary": Asymmetric viability of reciprocal F1 hybrids in centrarchid fishes. *Genetics*. 2008; 178(2):1037–48. doi: [10.1534/genetics.107.081364](https://doi.org/10.1534/genetics.107.081364) PMID: [WOS:000253577100034](https://pubmed.ncbi.nlm.nih.gov/253577100034/).
119. Arnold SJ, Verrell PA, Tilley SG. The evolution of asymmetry in sexual isolation: A model and a test case. *Evolution*. 1996; 50(3):1024–33. doi: [10.2307/2410643](https://doi.org/10.2307/2410643) PMID: [WOS:A1996UY55500005](https://pubmed.ncbi.nlm.nih.gov/A1996UY55500005/).
120. Devitt TJ, Baird SJE, Moritz C. Asymmetric reproductive isolation between terminal forms of the salamander ring species *Ensatina eschscholtzii* revealed by fine-scale genetic analysis of a hybrid zone. *Bmc Evolutionary Biology*. 2011; 11. doi: [10.1186/1471-2148-11-245](https://doi.org/10.1186/1471-2148-11-245) PMID: [WOS:000294952500001](https://pubmed.ncbi.nlm.nih.gov/294952500001/).
121. Robbins TR, Walker LE, Gorospe KD, Karl SA, Schrey AW, McCoy ED, et al. Rise and fall of a hybrid zone: Implications for the roles of aggression, mate choice, and secondary succession. *Journal of Heredity*. 2014; 105(2):226–36. doi: [10.1093/jhered/est093](https://doi.org/10.1093/jhered/est093) PMID: [WOS:000331873200008](https://pubmed.ncbi.nlm.nih.gov/2331873200008/).
122. Sanchez-Guillen RA, Wullenreuther M, Rivera AC. Strong asymmetry in the relative strengths of pre-zygotic and postzygotic barriers between two damselfly sister species. *Evolution*. 2012; 66(3):690–707. doi: [10.1111/j.1558-5646.2011.01469.x](https://doi.org/10.1111/j.1558-5646.2011.01469.x) PMID: [WOS:000300931400007](https://pubmed.ncbi.nlm.nih.gov/300931400007/).
123. Berry OF. Inbreeding and promiscuity in the endangered grand skink. *Conservation Genetics*. 2006; 7(3):427–37. doi: [10.1007/s10592-005-9054-0](https://doi.org/10.1007/s10592-005-9054-0) PMID: [WOS:000238026600009](https://pubmed.ncbi.nlm.nih.gov/238026600009/).
124. Olsson M, Gullberg A, Tegelstrom H. Malformed offspring, sibling matings, and selection against inbreeding in the sand lizard (*Lacerta agilis*). *Journal of Evolutionary Biology*. 1996; 9(2):229–42. doi: [10.1046/j.1420-9101.1996.9020229.x](https://doi.org/10.1046/j.1420-9101.1996.9020229.x) PMID: [WOS:A1996UE87600009](https://pubmed.ncbi.nlm.nih.gov/A1996UE87600009/).
125. Wagner E. Temperature-dependent sex determination in a gekko lizard. *Quarterly Review of Biology*. 1980; 55:21.
126. Bull JJ. Sex determination in reptiles. *Quarterly Review of Biology*. 1980; 55(1):3–21. doi: [10.1086/411613](https://doi.org/10.1086/411613) PMID: [WOS:A1980JR70900001](https://pubmed.ncbi.nlm.nih.gov/A1980JR70900001/).
127. Bull JJ. Temperature-dependent sex determination in reptiles: validity of sex diagnosis in hatchling lizards. *Canadian Journal of Zoology-Revue Canadienne De Zoologie*. 1987; 65(6):1421–4. PMID: [WOS:A1987J388200019](https://pubmed.ncbi.nlm.nih.gov/A1987J388200019/).
128. Fitzpatrick BM, Shaffer HB. Hybrid vigor between native and introduced salamanders raises new challenges for conservation. *Proceedings of the National Academy of Sciences of the United States of America*. 2007; 104(40):15793–8. doi: [10.1073/pnas.0704791104](https://doi.org/10.1073/pnas.0704791104) PMID: [WOS:000249942700037](https://pubmed.ncbi.nlm.nih.gov/249942700037/).

129. Van der Sluijs I, Van Dooren T, Seehausen O, Van Alphen J. A test of fitness consequences of hybridization in sibling species of Lake Victoria cichlid fish. *Journal of Evolutionary Biology*. 2008; 21(2):480–91. doi: [10.1111/j.1420-9101.2007.01495.x](https://doi.org/10.1111/j.1420-9101.2007.01495.x) PMID: [WOS:000252965500009](https://pubmed.ncbi.nlm.nih.gov/15000000/).
130. Fuller RC. Genetic incompatibilities in killifish and the role of environment. *Evolution*. 2008; 62(12):3056–68. doi: [10.1111/j.1558-5646.2008.00518.x](https://doi.org/10.1111/j.1558-5646.2008.00518.x) PMID: [WOS:000261442900009](https://pubmed.ncbi.nlm.nih.gov/18000000/).
131. Pokorna M, Rabova M, Rab P, Ferguson-Smith M, Rens W, Kratochvil L. Differentiation of sex chromosomes and karyotypic evolution in the eye-lid geckos (Squamata: Gekkota: Eublepharidae), a group with different modes of sex determination. *Chromosome Research*. 2010; 18(7):809–20. doi: [10.1007/s10577-010-9154-7](https://doi.org/10.1007/s10577-010-9154-7) PMID: [WOS:000284957300005](https://pubmed.ncbi.nlm.nih.gov/20000000/).
132. Haldane JBS. Sex ratio and unisexual sterility in hybrid animals. *Journal of Genetics*. 1922; 12(2):101–9.
133. Turelli M, Orr HA. The dominance theory of Haldane's rule. *Genetics*. 1995; 140(1):389–402. PMID: [WOS:A1995QV52100032](https://pubmed.ncbi.nlm.nih.gov/15000000/).
134. Shine R, Phillips B, Wayne H, Lemaster M, Mason RT. Species-isolating mechanisms in a mating system with male mate choice (garter snakes, *Thamnophis* spp.). *Canadian Journal of Zoology-Revue Canadienne De Zoologie*. 2004; 82(7):1091–8. doi: [10.1139/z04-086](https://doi.org/10.1139/z04-086) PMID: [WOS:000224706100011](https://pubmed.ncbi.nlm.nih.gov/20000000/).
135. Placyk JS, Fitzpatrick BM, Casper GP, Small RS, Reynolds RG, Noble DWA, et al. Hybridization between two gartersnake species (*Thamnophis*) of conservation concern: a threat or an important natural interaction? *Conservation Genetics*. 2012; 13(3):649–63. doi: [10.1007/s10592-012-0315-4](https://doi.org/10.1007/s10592-012-0315-4) PMID: [WOS:000303476900004](https://pubmed.ncbi.nlm.nih.gov/20000000/).
136. Pokorna M, Kratochvil L. Phylogeny of sex-determining mechanisms in squamate reptiles: are sex chromosomes an evolutionary trap? *Zoological Journal of the Linnean Society*. 2009; 156(1):168–83. doi: [10.1111/j.1096-3642.2008.00481.x](https://doi.org/10.1111/j.1096-3642.2008.00481.x) PMID: [WOS:000265378100006](https://pubmed.ncbi.nlm.nih.gov/20000000/).
137. Baur B. Krötenechsen-Bastarde (*Phrynosoma*) (Sauria: Iguanidae). *Salamandra*. 1984; 20(2/3):70–87.
138. Galán P. Hibridación en laboratorio de *Podarcis bocagei* y *Podarcis carbonelli*. *Bol Asoc Herpetol Esp*. 2002; 13(1–2):28–31.
139. Kohler J, Hahn M, Kohler G. Divergent evolution of hemipenial morphology in two cryptic species of mainland anoles related to *Anolis polylepis*. *Salamandra*. 2012; 48(1):1–11. PMID: [WOS:000303241800001](https://pubmed.ncbi.nlm.nih.gov/20000000/).
140. Trobisch D, Glässer-Trobisch A. Ein Hybrid zwischen *Lacerta pamphylica* SCHMIDTLER, 1975 und *Lacerta strigata* EICHWALD, 1831. *Die Eidechse*. 2005; 16(1):25–9.
141. Godinho R, Crespo EG, Ferrand N, Harris DJ. Phylogeny and evolution of the green lizards, *Lacerta* spp. (Squamata: Lacertidae) based on mitochondrial and nuclear DNA sequences. *Amphibia-Reptilia*. 2005; 26(3):271–85. doi: [10.1163/156853805774408667](https://doi.org/10.1163/156853805774408667) PMID: [WOS:000232674800001](https://pubmed.ncbi.nlm.nih.gov/20000000/).
142. Watts PC, Buley KR, Boardman W, Ciofi C, Gibson O R. Parthenogenesis in komodo dragons. *Nature*. 2006; 444(7122):1021–2. doi: [10.1038/nature4441021a](https://doi.org/10.1038/nature4441021a) PMID: [WOS:000242971100041](https://pubmed.ncbi.nlm.nih.gov/20000000/).
143. Lampert KP. Facultative Parthenogenesis in Vertebrates: Reproductive Error or Chance? *Sexual Development*. 2008; 2(6):290–301. doi: [10.1159/000195678](https://doi.org/10.1159/000195678) PMID: [WOS:000264026900035](https://pubmed.ncbi.nlm.nih.gov/20000000/).
144. Neaves WB, Baumann P. Unisexual reproduction among vertebrates. *Trends in Genetics*. 2011; 27(3):81–8. doi: [10.1016/j.tig.2010.12.002](https://doi.org/10.1016/j.tig.2010.12.002) PMID: [WOS:000288685900001](https://pubmed.ncbi.nlm.nih.gov/20000000/).
145. Booth W, Smith CF, Eskridge PH, Hoss SK, Mendelson JR, Schuett GW. Facultative parthenogenesis discovered in wild vertebrates. *Biology Letters*. 2012; 8(6):983–5. doi: [10.1098/rsbl.2012.0666](https://doi.org/10.1098/rsbl.2012.0666) PMID: [WOS:000311025100025](https://pubmed.ncbi.nlm.nih.gov/20000000/).
146. Kinney ME, Wack RF, Grahn RA, Lyons L. Parthenogenesis in a Brazilian Rainbow Boa (*Epicrates cenchria cenchria*). *Zoo Biology*. 2013; 32(2):172–6. doi: [10.1002/zoo.21050](https://doi.org/10.1002/zoo.21050) PMID: [WOS:000317498100006](https://pubmed.ncbi.nlm.nih.gov/20000000/).
147. Grabbe J, Koch A. First and repeated cases of parthenogenesis in the varanid subgenus *Euprepiosaurus* (*Varanus indicus* species group) and the first successful breeding of *V. rainierguentheri* in captivity. *Biawak*. 2014; 8(2):79–87.
148. Robbins TR, Pruitt JN, Straub LE, McCoy ED, Mushinsky HR. Transgressive aggression in *Sceloporus* hybrids confers fitness through advantages in male agonistic encounters. *Journal of Animal Ecology*. 2010; 79(1):137–47. doi: [10.1111/j.1365-2656.2009.01594.x](https://doi.org/10.1111/j.1365-2656.2009.01594.x) PMID: [WOS:000272656600016](https://pubmed.ncbi.nlm.nih.gov/20000000/).
149. Hiadlovská Z, Bimova BV, Mikula O, Pialek J, Macholan M. Transgressive segregation in a behavioural trait? Explorative strategies in two house mouse subspecies and their hybrids. *Biological Journal of the Linnean Society*. 2013; 108(1):225–35. doi: [10.1111/j.1095-8312.2012.01997.x](https://doi.org/10.1111/j.1095-8312.2012.01997.x) PMID: [WOS:000312543100019](https://pubmed.ncbi.nlm.nih.gov/20000000/).

150. Nichols P, Genner MJ, van Oosterhout C, Smith A, Parsons P, Sungani H, et al. Secondary contact seeds phenotypic novelty in cichlid fishes. *Proceedings of the Royal Society B-Biological Sciences*. 2015; 282(1798). doi: [10.1098/rspb.2014.2272](https://doi.org/10.1098/rspb.2014.2272) PMID: [WOS:000344595000014](https://pubmed.ncbi.nlm.nih.gov/260000014/).
151. Strasburg J, Kearney M. Phylogeography of sexual *Heteronotia binoei* (Gekkonidae) in the Australian arid zone: climatic cycling and repetitive hybridization. *Molecular Ecology*. 2005; 14(9):2755–72. doi: [10.1111/j.1365-294X.2005.02627.x](https://doi.org/10.1111/j.1365-294X.2005.02627.x) PMID: [WOS:000230573600012](https://pubmed.ncbi.nlm.nih.gov/1726203000012/).
152. Garland T Jr., Losos JB. Ecological morphology of locomotor performance in squamate reptiles. In: Wainwright PC, Reilly S, editors. *Ecological Morphology: Integrative Organismal Biology*. Chicago: University of Chicago Press; 1994. p. 240–302.
153. Vitt L, Caldwell J, Zani P, Titus T. The role of habitat shift in the evolution of lizard morphology: Evidence from tropical *Tropidurus*. *Proceedings of the National Academy of Sciences of the United States of America*. 1997; 94(8):3828–32. doi: [10.1073/pnas.94.8.3828](https://doi.org/10.1073/pnas.94.8.3828) PMID: [WOS:A1997WW81000064](https://pubmed.ncbi.nlm.nih.gov/11997000064/).
154. Herrel A, Meyers J, Vanhooydonck B. Correlations between habitat use and body shape in a phrynosomatid lizard (*Urosaurus ornatus*): a population-level analysis. *Biological Journal of the Linnean Society*. 2001; 74(3):305–14. doi: [10.1006/bjil.2001.0579](https://doi.org/10.1006/bjil.2001.0579) PMID: [WOS:000172620300003](https://pubmed.ncbi.nlm.nih.gov/1726203000003/).
155. Kearney M, Shine R. Morphological and physiological correlates of hybrid parthenogenesis. *American Naturalist*. 2004; 164(6):803–13. doi: [10.1086/425986](https://doi.org/10.1086/425986) PMID: [WOS:000225968000012](https://pubmed.ncbi.nlm.nih.gov/225968000012/).
156. Kearney M, Wahl R, Autumn K. Increased capacity for sustained locomotion at low temperature in parthenogenetic geckos of hybrid origin. *Physiological and Biochemical Zoology*. 2005; 78(3):316–24. doi: [10.1086/430033](https://doi.org/10.1086/430033) PMID: [WOS:000229127600002](https://pubmed.ncbi.nlm.nih.gov/229127600002/).
157. Seehausen O. Hybridization and adaptive radiation. *Trends in Ecology & Evolution*. 2004; 19(4):198–207. doi: [10.1016/j.tree.2004.01.003](https://doi.org/10.1016/j.tree.2004.01.003) PMID: [WOS:000220842400007](https://pubmed.ncbi.nlm.nih.gov/220842400007/).
